---

# Differential relationships between brain structure and dual task walking in young and older adults

KE Hupfeld<sup>1</sup>, JM Geraghty<sup>2</sup>, HR McGregor<sup>1</sup>, CJ Hass<sup>1</sup>, O Pasternak<sup>3</sup>,  
and RD Seidler<sup>1,4,\*</sup>

<sup>1</sup>*Department of Applied Physiology & Kinesiology, University of Florida, Gainesville, FL, USA*

<sup>2</sup>*Formerly: Department of Applied Physiology and Kinesiology, University of Florida, Gainesville, FL, USA; Current: School of Medicine, University of Central Florida, Orlando, FL, USA*

<sup>3</sup>*Departments of Psychiatry and Radiology, Brigham and Women's Hospital, Harvard Medical School, Boston, MA, USA*

<sup>4</sup>*University of Florida Norman Fixel Institute for Neurological Diseases, Gainesville, FL, USA*

Correspondence\*:  
Rachael Seidler, PhD  
[rachaelseidler@ufl.edu](mailto:rachaelseidler@ufl.edu)

## 2 CONTRIBUTION TO THE FIELD

3 Older age is associated with poorer mobility, including difficulties in performing a cognitive task  
4 while walking (i.e., dual task walking). Our work contributes to the field by examining multimodal  
5 structural neuroimaging data to characterize how brain structure relates to dual task walking in  
6 young versus older adults. We extracted multiple indices from  $T_1$ -weighted and diffusion-weighted  
7 magnetic resonance imaging (MRI) scans that describe morphological characteristics of brain  
8 gray matter, white matter, and cerebrospinal fluid. We analyzed MRI and gait data from 37 young  
9 (18-34 years) and 23 older (66-86 years) adults. We identified multiple relationships between  
10 regional brain atrophy and greater dual task costs (DTcosts) to gait, i.e., greater slowing of gait  
11 speed and greater increases in gait variability from single to dual task walking. Specifically, for the  
12 older adults only, thinner temporal cortex and shallower sulcal depth in the frontal, sensorimotor,  
13 and parietal cortices were associated with larger DTcosts to walking. Additionally, for the older  
14 adults only, ventricular volume and superior longitudinal fasciculus free-water corrected axial  
15 and radial diffusivity were associated with larger DTcosts. These findings illustrate that temporal,  
16 frontoparietal and sensorimotor brain structures are associated with walking DTcosts in older  
17 adults, highlighting potential targets for interventions.

18 **ABSTRACT**

19 Almost 25% of all older adults experience difficulty walking. Mobility difficulties for older adults  
20 are more pronounced when performing a simultaneous cognitive task while walking (i.e., dual  
21 task walking). Although it is known that aging results in widespread brain atrophy, few studies  
22 have integrated across more than one neuroimaging modality to comprehensively examine  
23 the structural neural correlates that may underly dual task walking in older age. We collected  
24 spatiotemporal gait data during single and dual task walking for 37 young (18-34 years) and 23  
25 older adults (66-86 years). We also collected  $T_1$ -weighted and diffusion-weighted MRI scans to  
26 determine how brain structure differs in older age and relates to dual task walking. We addressed  
27 two aims: 1) to characterize age differences in brain structure across a range of metrics including  
28 volumetric, surface, and white matter microstructure; and 2) to test for age group differences in the  
29 relationship between brain structure and the dual task cost (DTcost) of gait speed and variability.  
30 Key findings included widespread brain atrophy for the older adults, with the most pronounced  
31 age differences in brain regions related to sensorimotor processing. We also found multiple  
32 associations between regional brain atrophy and greater DTcost of gait speed and variability  
33 for the older adults. The older adults showed a relationship of both thinner temporal cortex and  
34 shallower sulcal depth in the frontal, sensorimotor, and parietal cortices with greater DTcost  
35 of gait. Additionally, the older adults showed a relationship of ventricular volume and superior  
36 longitudinal fasciculus free-water corrected axial and radial diffusivity with greater DTcost of gait.  
37 These relationships were not present for the young adults. Stepwise multiple regression found  
38 sulcal depth in the left precentral gyrus, axial diffusivity in the superior longitudinal fasciculus, and  
39 sex to best predict DTcost of gait speed, and cortical thickness in the superior temporal gyrus  
40 to best predict DTcost of gait variability for older adults. These results contribute to scientific  
41 understanding of how individual variations in brain structure are associated with mobility function  
42 in aging. This has implications for uncovering mechanisms of brain aging and for identifying target  
43 regions for mobility interventions for aging populations.

44 **Keywords:** aging; dual task walking; dual task cost (DTcost); gray matter volume; cortical thickness; sulcal depth; ventricular volume;  
45 free water

## 1 INTRODUCTION

46 Nearly 25 percent of older adults report serious mobility problems such as difficulty walking  
47 or climbing stairs (Kraus, 2016). Older adults tend to encounter even greater difficulty with  
48 performing a secondary cognitive task while walking, i.e., dual task walking (e.g., Hollman et al.  
49 2007; Malcolm et al. 2015; Smith et al. 2016; Springer et al. 2006). A common measure of  
50 dual task walking performance is dual task cost (DTcost), or the magnitude of performance  
51 decline when conducting two tasks at once as opposed to individually (Bayot et al., 2020; Yogev-  
52 Seligmann et al., 2008). Older adults typically exhibit greater DTcosts compared with young  
53 adults, such as greater slowing of gait speed during dual conditions (for review, see Al-Yahya  
54 et al., 2011; Beurskens and Bock, 2012). Examining DTcost is considered more useful than  
55 assessing single or dual condition performance in isolation, as cost metrics incorporate individual  
56 differences in baseline performance (Verhaeghen et al., 2003).

57 Poorer dual task walking abilities have been related to increased fall risk (e.g., Bridenbaugh  
58 and Kressig, 2015; Lundin-Olsson et al., 1997; Montero-Odasso et al., 2012), cognitive decline  
59 (Montero-Odasso et al., 2017), frailty, disability, and mortality (Verghese et al., 2012). Importantly,  
60 dual task walking performance is more predictive of falls in aging than single task walking  
61 performance (Ayers et al., 2014; Gillain et al., 2019; Halliday et al., 2018; Johansson et al., 2016;  
62 Verghese et al., 2017). This could be because dual task walking provides a better analog for  
63 real-world scenarios, such as talking to friends or reading street signs while walking. Indeed, a  
64 recent study reported that in-lab dual task walking attributes (gait speed, step regularity, and  
65 stride regularity) were more similar to real-world gait (measured during daily life with a wearable  
66 sensor), as compared with normal walking in lab with no dual tasking requirements (Hillel et al.,  
67 2019). Thus, given the link between dual task walking performance and falls, and its greater  
68 ecological validity, we selected to analyze dual instead of single task walking in the present  
69 work. There are clear cortical contributions to the control of walking (Allali et al., 2014; Koenraadt  
70 et al., 2014; Miyai et al., 2001; Petersen et al., 2012; Takakusaki, 2017). Thus, poorer dual  
71 task walking performance in older age has been attributed, at least in part, to age-related brain  
72 atrophy (Allali et al., 2019; Lucas et al., 2019; Ross et al., 2021). A large body of literature  
73 suggests that age-related structural brain atrophy occurs in an anterior-to-posterior pattern, with  
74 the frontal cortices atrophying earlier and faster than other regions of the brain (e.g., Fjell et al.,  
75 2009a; Lemaitre et al., 2012; Salat et al., 2004; Thambisetty et al., 2010). Given this, it is not  
76 surprising that previous work has linked lower prefrontal cortex gray matter volume with poorer  
77 dual task walking abilities in older adults (Tripathi et al., 2019; Wagshul et al., 2019). Aging is  
78 hypothesized to increase reliance on alternative (i.e., non-motor) neural resources, such as the  
79 frontal cortex (Mirelman et al., 2017), to compensate for brain atrophy in sensorimotor regions  
80 and maintain performance (Cabeza et al., 2002; Fettes et al., 2021b; Steffener and Stern, 2012).  
81 Interestingly, recent work in a large sample of middle- to older-aged adults ( $n = 966$ ) has reported  
82 disproportionately steep age differences (i.e., atrophy, demyelination, and iron reduction) in the  
83 sensorimotor cortices rather than in prefrontal regions (Taubert et al., 2020). Thus, structural  
84 changes in the sensorimotor cortices with aging may also contribute to age-related mobility  
85 declines.

86 Many previous studies have reported relationships between age differences in regional brain  
87 structure (e.g., atrophy in widespread cortical and subcortical regions, including the frontal and  
88 sensorimotor cortices, basal ganglia, cerebellum, and motor tracts) and worse gait for older

89 adults during single task walking, such as slowed gait speed and increased gait variability (for  
90 review, see Tian et al., 2017; Wilson et al., 2019). However, compared to the extensive literature  
91 examining single task walking, only limited work examining brain structure has focused on dual  
92 task walking in aging. A majority of the studies examining correlates of dual task walking in aging  
93 have instead focused on brain function, using functional near-infrared spectroscopy (fNIRS).  
94 These studies have largely found increases in prefrontal cortex oxygenation levels from single  
95 to dual task walking for older adults, suggesting that dual compared with single task walking  
96 demands more prefrontal neural resources (e.g., Beurskens et al., 2014; Doi et al., 2013; Holtzer  
97 et al., 2015). As dual task walking is more cognitively demanding than normal walking, it is logical  
98 that functional contributions from the prefrontal cortex increase during dual task walking (Holtzer  
99 et al., 2015); thus, markers of prefrontal cortex structure might also relate to dual task walking  
100 performance in older age. Overall, while these functional studies provide important insight into the  
101 vasodynamic response to dual task walking, further work is needed to understand how markers  
102 of brain structure relate to dual task walking in aging as well.

103 The small body of work that has investigated relationships between brain structure and dual  
104 task walking in older adults suggests an important link between “maintenance” of brain structure  
105 and maintenance of dual task walking abilities. Two previous studies found associations between  
106 greater gait slowing during dual task walking in older adults and lower gray matter volume in the  
107 middle frontal gyrus (Allali et al., 2019), medial prefrontal and cingulate cortices, and thalamus  
108 (Tripathi et al., 2019). Further, several separate studies found that older adults who showed  
109 a greater increase in prefrontal cortex oxygenation from single to dual task walking also had  
110 lower white matter fractional anisotropy (averaged across the whole white matter mask; Lucas  
111 et al., 2019), lower gray matter volume within the frontal lobe (and specifically, the superior  
112 and rostral middle frontal gyri; Wagshul et al., 2019), and reduced cortical thickness across the  
113 frontal, parietal, temporal, occipital, cingulate, and insular cortices (Ross et al., 2021). These  
114 imaging metrics were not related to faster dual task walking, though, suggesting that the observed  
115 increases in prefrontal cortex activity represented compensation to maintain walking performance,  
116 despite atrophying brain structure.

117 The prior work described above examining the brain structural correlates of dual task walking  
118 tested only one structural imaging modality in isolation. Here we combined across multiple  
119 imaging modalities to provide more comprehensive information about age differences in brain  
120 structure and how these relate to dual task walking. We assessed volumetric metrics of atrophy,  
121 i.e., gray matter, cerebellar, hippocampal, and ventricular volume. We also examined surface  
122 metrics, including cortical thickness (Dahnke et al., 2013), sulcal depth (Yun et al., 2013), cortical  
123 complexity (i.e., folding complexity of the cortex; Yotter et al., 2011b), and gyrification index (i.e.,  
124 mean curvature of the cortex; Luders et al., 2006). Surface-based morphometry metrics have  
125 several advantages over volume-based metrics (Hutton et al., 2009; Lemaitre et al., 2012; Winkler  
126 et al., 2010), including more accurate spatial registration (Desai et al., 2005), sensitivity to surface  
127 folding, and independence from head size (Gaser and Kurth, 2017). Despite these potential  
128 benefits, compared to volumetric measures, less work has examined how surface measures  
129 relate to dual task walking in aging.

130 We also examined white matter microstructure metrics derived from diffusion MRI, including  
131 free-water (FW) corrected fractional anisotropy (FA<sub>t</sub>, “t” refers to the tissue compartment remaining  
132 after FW correction), axial diffusivity (AD<sub>t</sub>), and radial diffusivity (RD<sub>t</sub>), and the fractional volume

133 of FW (Pasternak et al., 2009). FW correction is particularly important for analyses of older adult  
134 brains because age-related white matter degeneration can lead to enlarged interstitial spaces  
135 (Meier-Ruge et al., 1992) and thereby increased partial volume effects between white matter  
136 fibers and extracellular water (Chad et al., 2018). Recent work found that FW correction results in  
137 less pronounced age differences in white matter microstructure than previously reported (Chad  
138 et al., 2018), suggesting that prior age difference results are at least partially driven by fluid  
139 effects. Thus, to increase interpretability of white matter microstructural effects, it is important to  
140 correct for FW when examining white matter in aging. Moreover, higher FW has been related  
141 to poorer cognition in aging (Gullett et al., 2020; Maillard et al., 2019) and poorer function (e.g.,  
142 bradykinesia) in Parkinson's disease (Ofori et al., 2015).

143 In the present work, we addressed several aims: 1) To characterize age differences in brain  
144 structure; we predicted the most pronounced age differences in the prefrontal cortex. 2) To identify  
145 regions of age differences in the relationship between brain structure and DTcost of gait speed  
146 and variability; given the fNIRS literature reporting increased prefrontal cortex activation during  
147 dual task walking (Beurskens et al., 2014; Doi et al., 2013; Holtzer et al., 2015), we predicted that  
148 greater prefrontal atrophy would correlate with greater DTcost of gait speed and variability for  
149 older but not younger adults. 3) To determine the strongest predictor(s) of DTcost of gait in older  
150 adults using a stepwise regression approach. This was an exploratory aim, and thus we did not  
151 define an *a priori* hypothesis.

## 2 MATERIALS AND METHODS

152 The University of Florida's Institutional Review Board provided ethical approval for the study. All  
153 individuals provided their written informed consent.

### 154 2.1 Participants

155 37 young and 25 older adults from the Gainesville, FL community participated in this study.  
156 Due to the coronavirus 2019 (COVID-19) global pandemic, data collection for this study was  
157 terminated early, before the planned sample size for older adult participants was attained. Two  
158 older adults were excluded from analyses of the  $T_1$ -weighted images. One of these older adults  
159 did not fit within the 64-channel coil, so a 20-channel coil was used instead; due to low image  
160 quality, we excluded their data from further analysis. The other older adult  $T_1$ -weighted scan  
161 was excluded due to an incidental brain tumor finding. Thus,  $n = 23$  older adults for all analyses  
162 involving the  $T_1$ -weighted images. Due to time constraints, a diffusion MRI was not collected for  
163 one young and two older adults; thus,  $n = 36$  young and  $n = 21$  older adults for all diffusion MRI  
164 analyses. Of note, we reported on a different subset of behavioral and brain metrics from this  
165 same cohort in two recent publications (Fettrow et al., 2021a; Hupfeld et al., 2021b).

166 We screened all subjects for MRI eligibility and, as part of the larger study, transcranial magnetic  
167 stimulation (TMS) eligibility. We excluded those with any MRI or TMS contraindications (e.g.,  
168 implanted metal, claustrophobia, or pregnancy). We also excluded individuals with: history of  
169 any neurologic condition (e.g., stroke, Parkinson's disease, seizures, or a concussion in the  
170 last six months); a current psychiatric condition (e.g., active depression or bipolar disorder);  
171 self-reported smokers; those who self-reported consuming more than two alcoholic drinks per day  
172 on average; and those with history of treatment for alcoholism. All participants were right-handed

173 and self-reported their ability to walk unassisted for at least 10 minutes and to stand for at least  
174 30 seconds with their eyes closed.

175 Prior to enrollment, we screened participants for suspected cognitive impairment over the phone  
176 using the Telephone Interview for Cognitive Status (TICS; de Jager et al., 2003). We excluded  
177 those who scored  $< 21$  of 39 points; this is equivalent to scoring  $< 25$  points on the Mini-Mental  
178 State Exam (MMSE) and indicates probable cognitive impairment (de Jager et al., 2003). At the  
179 first testing session, we re-screened participants for cognitive impairment using the Montreal  
180 Cognitive Assessment (MoCA; Nasreddine et al., 2005). We added one point to the scores of  
181 participants with  $\leq 12$  years of education (Nasreddine et al., 2005). We did not enroll those who  
182 scored  $< 23$  of 30 points (Carson et al., 2018).

## 183 **2.2 Testing Sessions**

184 Before the first session, we collected self-reported participant information on: demographics  
185 (e.g., age, sex, and years of education), medical history, handedness, footedness, exercise,  
186 and sleep. We also collected anthropometric information (e.g., height, weight, and leg length).  
187 Participants then completed mobility testing, followed by an MRI scan approximately five days  
188 later (Fig. 1). For 24 hours prior to each session, participants were requested to not consume  
189 alcohol, nicotine, or any drugs other than the medications they disclosed to us. At the start of  
190 each session, participants completed the Stanford Sleepiness Questionnaire, which asks for  
191 self-report of the hours slept the previous night and a current sleepiness rating (Hoddes et al.,  
192 1972).

## 193 **2.3 Session 1: Mobility Testing**

194 Participants completed three walking tasks while instrumented with six Opal inertial  
195 measurement units (IMUs; v2; APDM Wearable Technologies Inc., Portland, OR, USA). IMUs  
196 were placed on the feet, wrists, around the waist at the level of the lumbar spine, and across the  
197 torso at the level of the sternal angle (Fig. 1). First, participants walked back and forth across  
198 a 9.75 m room for four minutes at whichever pace they considered to be their “normal” walking  
199 speed (NW). Participants were instructed to refrain from talking, to keep their arms swinging  
200 freely at their sides, and to keep their head up and gaze straight ahead. Each time they reached  
201 the end of the room, they completed a 180-degree turn and walked the length of the room again.

202 Next, participants completed two trials of walking while talking (WWT-1 and WWT-2) and one  
203 trial of talking only. The WWT and talking only trials lasted for two minutes each. During the WWT  
204 trials, participants walked at their normal speed while counting backwards by 7s (Li et al., 2014),  
205 starting at number 299, 298, or 296. The WWT instructions were identical to those provided  
206 for the 4-minute walk, except that participants were additionally instructed to “try and pay equal  
207 attention to walking and talking” (Verghese et al., 2007). For the talking only trial, participants sat  
208 in a chair and counted backwards by 7s for two minutes. We counterbalanced the order of the  
209 WWT-1, WWT-2, and talking only trials and the starting number across all participants.

## 210 **2.4 Spatiotemporal Variable Calculation**

211 During both the walking and the balance tasks, we recorded inertial data using MobilityLab  
212 software (v2; APDM Wearable Technologies Inc., Portland, OR, USA). After each trial,  
213 MobilityLab calculated 14 spatiotemporal gait variables. The algorithm for calculating

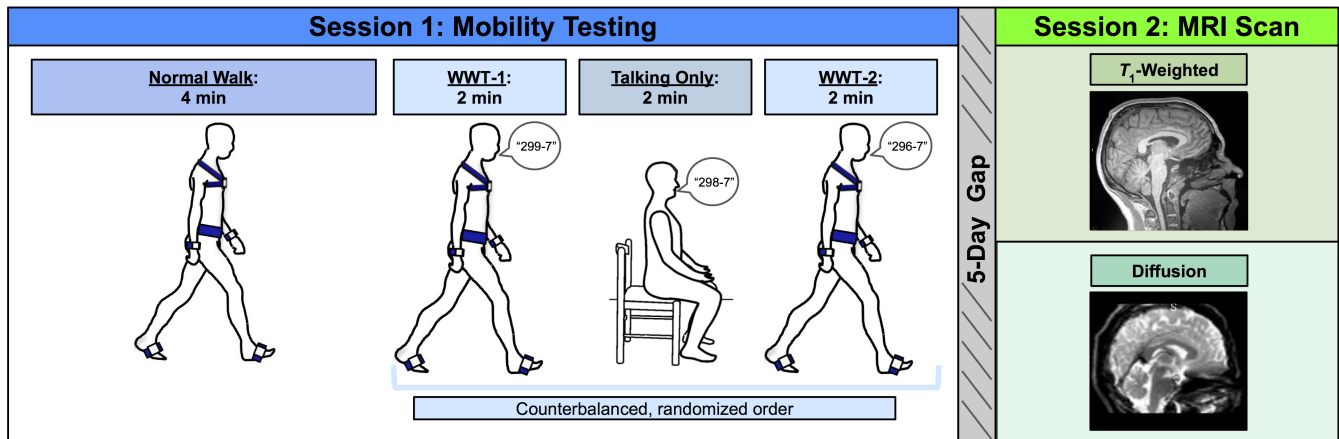

**Figure 1.** Methods overview. Left: During Session 1, participants first completed a normal (single task) overground walk (NW) at a comfortable self-selected speed. Next, participants completed three trials in a counterbalanced order: two walking while talking trials (WWT-1 and WWT-2) in which participants counted backwards by 7s while walking, and one talking only trial in which participants stayed seated while counting backwards by 7s. Right: Approximately five days later, during Session 2, participants completed an MRI protocol, which included a  $T_1$ -weighted anatomical scan and a diffusion-weighted scan.

214 these metrics has been validated through comparison to force plate and motion capture  
215 data (see internal validation by MobilityLab: [https://support.apdm.com/hc/en-us/  
216 articles/360000177066-How-are-Mobility-Lab-s-algorithms-validated-](https://support.apdm.com/hc/en-us/articles/360000177066-How-are-Mobility-Lab-s-algorithms-validated-) and  
217 (Washabaugh et al., 2017). To condense the gait variables into several summary metrics, for  
218 each trial, we extracted one variable from each of the four gait domains described by Hollman  
219 et al. (2011a): gait rhythm (cadence (steps/min)), gait phase (stance (% gait cycle)), gait pace  
220 (speed (m/s)), and gait variability (step time variability (standard deviation)). We calculated the  
221 average of each of these four variables for the NW and WWT-1 and WWT-2 trials to produce one  
222 variable for each of the four gait domains for NW and WWT.

## 223 2.5 Cognitive Outcome Variable Calculation

224 We also measured cognitive performance during the seated compared to WWT conditions. We  
225 examined both speed (i.e., total number of subtraction problems attempted) and accuracy (i.e., %  
226 correct) during both the seated and WWT conditions.

## 227 2.6 DTcost Calculation

228 To characterize differences in these gait and cognitive performance summary metrics between  
229 single and dual task conditions, similar to a large body of previous work (e.g., Kelly et al., 2010;  
230 Patel et al., 2014; Van Impe et al., 2011), we calculated the DTcost of each variable as follows:

$$DTcost = \left( \frac{WWT \text{ measure} - ST \text{ measure}}{WWT \text{ measure}} \right) * 100 \quad (1)$$

231 We then calculated a correlation matrix for the four resulting DTcost of gait measures across the  
232 whole sample. This revealed that DTcost of gait speed was highly correlated with the DTcost of  
233 cadence ( $r = 0.90$ ,  $p < 0.001$ ) and DTcost of stance time ( $r = -0.85$ ,  $p < 0.001$ ). Thus, we opted to

234 analyze only two variables as primary outcome metrics in our final statistical analyses: 1) DTcost  
235 of gait speed; and 2) DTcost of step time variability. Both slower gait speed and increased step  
236 time variability have been related to higher fall risk for older adults (Callisaya et al., 2011; Espy  
237 et al., 2010; Quach et al., 2011).

## 238 **2.7 Session 2: MRI Scan**

239 We acquired an MRI scan for each participant using a Siemens MAGNETOM Prisma 3 T  
240 scanner (Siemens Healthcare, Erlangen, Germany) with a 64-channel head coil.

### 241 **2.7.1 Anatomical acquisition**

242 We collected a 3D  $T_1$ -weighted anatomical image using a magnetization-prepared rapid  
243 gradient-echo (MPRAGE) sequence. The parameters for this anatomical image were as follows:  
244 repetition time (TR) = 2000 ms, echo time (TE) = 3.06 ms, flip angle =  $8^\circ$ , field of view =  $256 \times$   
245  $256 \text{ mm}^2$ , slice thickness = 0.8 mm, 208 slices, voxel size =  $0.8 \text{ mm}^3$ .

### 246 **2.7.2 Diffusion-weighted acquisition**

247 We also collected a diffusion-weighted spin-echo prepared echo-planar imaging sequence with  
248 the following parameters: 5  $b_0$  scans (without diffusion weighting), 64 gradient directions with  
249 diffusion weighting  $1000 \text{ s/mm}^2$ , TR = 6400 ms, TE = 58 ms, isotropic resolution =  $2 \times 2 \times 2 \text{ mm}$ ,  
250 FOV =  $256 \times 256 \text{ mm}^2$ , 69 slices, phase encoding direction = Anterior to Posterior. Immediately  
251 prior to this acquisition, we collected 5  $b_0$  scans (without diffusion weighting) in the opposite  
252 phase encoding direction (Posterior to Anterior) for later use in distortion correction.

## 253 **2.8 $T_1$ -Weighted Image Processing for Voxelwise Analyses**

### 254 **2.8.1 Gray matter volume**

255 We processed the  $T_1$ -weighted scans using the Computational Anatomy Toolbox toolbox  
256 (version r1725; Gaser et al., 2016; Gaser and Kurth, 2017) in MATLAB (R2019b). We implemented  
257 default CAT12 preprocessing steps, including the new adaptive probability region-growing skull  
258 stripping method. Briefly, the CAT12 pipeline includes segmentation into gray matter, white  
259 matter, and cerebrospinal fluid, followed by spatial normalization from subject space to standard  
260 space using high-dimensional Dartel registration and modulation. After CAT12 preprocessing  
261 was complete, we visually examined data quality by displaying each modulated, normalized gray  
262 matter segment and checking alignment between subjects and with the standard space template.  
263 We did not remove any scans as a result of visual inspection. All scans passed acceptable  
264 CAT12 quantitative quality control thresholds (i.e., resolution, noise, bias, and image quality >  
265 80). Finally, we used the CAT12 *Check Sample Homogeneity* function to evaluate correlations  
266 between all gray matter segments. Gray matter segments for each participant were within two  
267 standard deviations of the group mean, indicating that the sample contained no outliers. To  
268 increase signal-to-noise ratio, we smoothed the modulated, normalized gray matter segments  
269 using Statistical Parametric Mapping 12 (SPM12, v7771; Ashburner et al., 2014) with an 8 mm full  
270 width at half maximum kernel. We entered these preprocessed gray matter volume maps into the  
271 group-level voxelwise statistical models described in Section 2.13. We used CAT12 to calculate  
272 total intracranial volume for each participant for later use as a covariate in these group-level  
273 statistical analyses.



## 274 2.8.2 Cortical surface metrics

275 The CAT12 pipeline also extracts surface-based morphometry metrics (Dahnke et al., 2013;  
276 Yotter et al., 2011a). To calculate surface metrics, CAT12 uses a projection-based thickness  
277 algorithm that handles partial volume information, sulcal blurring, and sulcal asymmetries without  
278 explicit sulcus reconstruction (Dahnke et al., 2013; Yotter et al., 2011a). We used CAT12 to extract  
279 four surface metrics: 1) cortical thickness: the thickness of the cortical gray matter between  
280 the outer surface (i.e., the gray matter-cerebrospinal fluid boundary) and the inner surface (i.e.,  
281 the gray matter-white matter boundary) (Dahnke et al., 2013); 2) cortical complexity: fractal  
282 dimension, a metric of folding complexity of the cortex (Yotter et al., 2011b); 3) sulcal depth: the  
283 Euclidean distance between the central surface and its convex hull (Yun et al., 2013); and 4)  
284 gyrification index: a metric based on the absolute mean curvature, which quantifies the amount  
285 of cortex buried within the sulcal folds as opposed to the amount of cortex on the “outer” visible  
286 surface (Luders et al., 2006). Prior to further analysis, we visually checked all cortical surface  
287 data using CAT12’s *Display Surfaces* tool and then resampled and smoothed the surfaces at 15  
288 mm for cortical thickness and 20 mm for the three other metrics. We entered these resampled  
289 and smoothed surface files into the group-level voxelwise statistical models described in Section  
290 2.13.

## 291 2.8.3 Cerebellar volume

292 To improve the normalization of the cerebellum (Diedrichsen, 2006; Diedrichsen et al., 2009),  
293 similar to our past work (Hupfeld et al., 2021a; Salazar et al., 2020, 2021), we applied specialized  
294 preprocessing steps to the cerebellum to produce cerebellar volume maps. First, we entered  
295 each participant’s whole-brain  $T_1$ -weighted image into the CEREBellum Segmentation (CERES)  
296 pipeline (Romero et al., 2017). CERES uses a patch-based segmentation approach to segment  
297 the cerebellum from the cortex; this automated method has been demonstrated to perform better  
298 than either semi-automatic or manual cerebellar segmentation (Romero et al., 2017). We visually  
299 inspected the resulting segmentations, created a binary mask from each participant’s CERES  
300 cerebellar segmentation, and used this mask to extract their cerebellum from their whole-brain  $T_1$ -  
301 weighted image. We then used rigid, affine, and Symmetric Normalization (SyN) transformation  
302 procedures within the Advanced Normalization Tools package (ANTs; v1.9.17; Avants et al., 2010,  
303 2011) to warp (in a single step) each participant’s extracted subject space cerebellum to a 1  
304 mm cerebellar template in standard space, the Spatially Unbiased Infratentorial Template (SUIT)  
305 template (Diedrichsen, 2006; Diedrichsen et al., 2009). The SUIT template was selected because  
306 it offers greater detail of internal cerebellar structures compared to whole brain templates, which  
307 improves cerebellar normalization (Diedrichsen, 2006; Diedrichsen et al., 2009). For this warping  
308 we used a version of the SUIT template with the brainstem removed, as the CERES cerebellar  
309 segmentation does not include the brainstem.

310 The flowfields that were applied to warp these cerebellar segments to SUIT space were  
311 additionally used to calculate the Jacobian determinant image, using ANTs’  
312 *CreateJacobianDeterminantImage.sh* function; the Jacobian determinant encodes local shrinkage  
313 and expansion for each voxel between subject space and the target image (i.e., here, the standard  
314 space template). We multiplied each normalized cerebellar segment by its corresponding Jacobian  
315 determinant to produce modulated cerebellar images in standard space for each participant.  
316 Modulation preserves the volumes present in the original untransformed (subject space) image.

317 Lastly, to increase signal-to-noise ratio, we smoothed the modulated, normalized cerebellar  
318 images using a kernel of 2 mm full width at half maximum and entered the resulting cerebellar  
319 volume maps into the group-level voxelwise statistical models described in Section 2.13. Of note,  
320 we used cerebellar total volumes in our analyses instead of segmenting the cerebellum by tissue  
321 type, in order to avoid any inaccuracy due to low contrast differences between cerebellar gray  
322 and white matter.

## 323 **2.9 Diffusion-Weighted Image Processing for Voxelwise Analyses**

### 324 **2.9.1 Diffusion preprocessing**

325 See Supplemental Information for further details regarding preprocessing of the diffusion-  
326 weighted data. We first visually inspected raw scans for artifacts and excessive head movement.  
327 We then corrected images for signal drift (Vos et al., 2017) using the ExploreDTI graphical toolbox  
328 (v4.8.6; [www.exploredti.com](http://www.exploredti.com); Leemans et al., 2009) in MATLAB (R2019b). Next, we used  
329 the FMRIB Software Library (FSL; v6.0.1; Jenkinson et al., 2012; Smith et al., 2004) processing  
330 tool *topup* to estimate the susceptibility-induced off-resonance field (Andersson et al., 2003). This  
331 procedure yielded a single corrected field map for use in eddy current correction. We used FSL's  
332 *eddy\_cuda* to simultaneously correct the data for eddy current-induced distortions and both inter-  
333 and intra-volume head movement (Andersson and Sotiropoulos, 2016).

### 334 **2.9.2 FW correction and tensor fitting**

335 We implemented a custom FW imaging algorithm (Pasternak et al., 2009) in MATLAB. This  
336 algorithm estimates FW fractional volume and FW corrected diffusivities by fitting a two-  
337 compartment model at each voxel (Pasternak et al., 2009). The two-compartment model consists  
338 of: 1) a tissue compartment modeling water molecules within or in the vicinity of white matter  
339 tissue, quantified by diffusivity (FA<sub>t</sub>, RD<sub>t</sub>, and AD<sub>t</sub>); and 2) a FW compartment, reflecting the  
340 proportion of water molecules with unrestricted diffusion, and quantified by the fractional volume  
341 of this compartment. FW ranges from 0 to 1; FW = 1 indicates that a voxel is filled with freely  
342 diffusing water molecules (e.g., as in the ventricles). These metrics (FA<sub>t</sub>, RD<sub>t</sub>, AD<sub>t</sub>, FW) are  
343 provided as maps for each voxel in the brain.

### 344 **2.10 Tract-Based Spatial Statistics**

345 We applied FSL's tract-based spatial statistics (TBSS) processing steps to prepare the data for  
346 voxelwise analyses across participants (Smith et al., 2006). Benefits of TBSS include avoiding  
347 problems associated with suboptimal image registration between participants and eliminating the  
348 need for spatial smoothing. TBSS uses a carefully-tuned nonlinear registration and projection onto  
349 an alignment-invariant tract representation (i.e., the mean FA skeleton); this process improves the  
350 sensitivity, objectivity, and interpretability of analyses of multi-subject diffusion studies. We used  
351 the TBSS pipeline as provided in FSL, which first includes eroding the FA images slightly and  
352 zeroing the end slices. Next, each participant's FA data is brought into a common space (i.e., the  
353 FMRIB58\_FA 1 mm isotropic template) using the nonlinear registration tool FNIRT (Andersson  
354 et al., 2007b,a). A mean FA image is then calculated and thinned to create a mean FA skeleton.  
355 Then, each participant's aligned FA data is projected onto the group mean skeleton. Lastly, we  
356 applied the same nonlinear registration to the FW, FA<sub>t</sub>, RD<sub>t</sub>, and AD<sub>t</sub> maps to project these data  
357 onto the original mean FA skeleton. Ultimately, these TBSS procedures resulted in skeletonized

358 FW, FAt, ADt, and RDt maps in standard space for each participant. These were the maps that  
359 we entered in the group-level voxelwise statistical models described in Section 2.13.

## 360 2.11 Image Processing for Region of Interest Analyses

### 361 2.11.1 Ventricle and gray matter volume regions of interest

362 CAT12 automatically calculates the inverse warp, from standard space to subject space, for  
363 several volume-based atlases. We isolated multiple regions of interest (ROIs) from these atlases  
364 in subject space: the lateral ventricles and pre- and postcentral gyri from the Neuromorphometrics  
365 (<http://Neuromorphometrics.com>) volume-based atlas, and the thalamus, striatum, and  
366 globus pallidus from the CoBra Subcortical atlas (Tullo et al., 2018; Fig. S1). We visually  
367 inspected each ROI mask overlaid onto each participant's  $T_1$ -weighted image in ITK-SNAP and  
368 hand corrected the ROI mask if needed (Yushkevich et al., 2006). Using *fs/stats*, we extracted the  
369 number of voxels in each ROI mask in subject space and calculated the mean image intensity  
370 within the ROI in the subject space cerebrospinal fluid (lateral ventricles) or gray matter segment  
371 (for all of the other ROIs). We then calculated ROI volume in mL as: (number of voxels in the ROI  
372 mask)\*(mean intensity of the tissue segment within the ROI mask)\*(volume/voxel). In subsequent  
373 statistical analyses, we used the average of the left and right side structures for each ROI, and we  
374 entered these ROI volumes as a percentage of total intracranial volume (to account for differences  
375 in head size).

### 376 2.11.2 FW ROIs

377 We also extracted FW values from the diffusion MRI maps for the same ROIs for which we  
378 calculated gray matter volume. We rigidly registered the subject space  $T_1$ -weighted image to  
379 the subject space FW image. (We used a rigid registration in this case because we previously  
380 used *topup* to resolve distortions during DWI preprocessing; Section 2.9.1). We then used ANTs  
381 to apply the inverse of that transformation to the subject  $T_1$ -space atlases described in Section  
382 2.11.1. This resulted in volumetric atlases for each participant in their native diffusion space.  
383 We then isolated masks for the same ROIs described in Section 2.11.1 from these atlases and  
384 visually inspected each ROI mask overlaid onto each participant's FW map in ITK-SNAP. Finally,  
385 we used *fs/stats* to extract mean image intensity in the FW map within each ROI mask. Here we  
386 used mean intensity as our outcome metric (rather than volume in mL as above) to estimate the  
387 fractional volume of FW within the ROI and obtain a metric more representative of microstructural  
388 FW, rather than the size of the ROI which represents macrostructural atrophy. We calculated the  
389 average mean intensity for the left and right side for each structure and used this average value  
390 in subsequent statistical analyses.

### 391 2.11.3 Hippocampal ROIs

392 We implemented the Automatic Segmentation of Hippocampal Subfields (ASHS)-T1 (Yushkevich  
393 et al., 2015) pipeline within ITK-SNAP (Yushkevich et al., 2015) to segment and extract the  
394 volume in mL of three hippocampal structures: anterior hippocampus, posterior hippocampus,  
395 and parahippocampal cortex. The ASHS pipeline uses a multi-atlas segmentation framework  
396 and super-resolution approach; this outperforms alternative  $T_1$  hippocampal segmentation  
397 pipelines by reducing misclassification of meninges as gray matter (Yushkevich et al., 2015).  
398 Though this pipeline is currently validated for use on only older adults (defined as those 55+  
399 years old; Yushkevich et al., 2015), for completeness, here we also implemented the pipeline

400 onmyounger adult participants. For statistical analyses, we used the average of the left and right  
401 side structures, and we entered these volumes as a percentage of total intracranial volume (to  
402 account for differences in head size).

## 403 **2.12 Statistical Analyses**

### 404 **2.12.1 Participant characteristics, testing timeline, and mobility performance**

405 We conducted all statistical analyses on the demographic and behavioral data using using R  
406 (v4.0.0; R Core Team, 2013). For each set of analyses, we applied the Benjamini-Hochberg  
407 false discovery rate (FDR) correction to the  $p$  values for the age group predictor (Benjamini and  
408 Hochberg, 1995).

### 409 **2.12.2 Demographic and behavioral data**

410 First, we compared demographic, physical characteristics, and testing timeline variables  
411 between the age groups. We tested the parametric t-test assumptions: normality within each  
412 group (Shapiro test,  $p > 0.05$ ) and homogeneity of variances between groups (Levene's test,  
413  $p > 0.05$ ). The majority of variables did not meet parametric assumptions, so we conducted  
414 nonparametric two-sided Wilcoxon rank-sum tests for age group differences. We report the group  
415 medians and interquartile ranges for each of these variables. We also report nonparametric effect  
416 sizes (Field et al., 2012; Rosenthal et al., 1994). To test for differences in the sex distribution  
417 within each age group, we conducted a Pearson chi-square test.

### 418 **2.12.3 Age differences in the DTcost of gait and subtraction performance**

419 To examine whether gait and subtraction performance differed between the single and dual  
420 task conditions and/or between the age groups, we used a linear mixed model approach (lme;  
421 Pinheiro et al., 2007). We entered age group, condition (i.e., single or dual task), and the age  
422 group\*condition interaction as predictors, and included a random intercept for each subject.

## 423 **2.13 Voxelwise Statistical Models**

424 We tested the same voxelwise models for each of the imaging modalities. In each case, we  
425 defined the model using SPM12 and then re-estimated each model using the Threshold-Free  
426 Cluster Enhancement toolbox (TFCE; <http://dbm.neuro.uni-jena.de/tfce>) with 5,000  
427 permutations. This toolbox provides non-parametric estimation using TFCE for models previously  
428 estimated using SPM parametric designs. Statistical significance was determined at  $p < 0.05$ ,  
429 family-wise error (FWE) corrected for multiple comparisons.

### 430 **2.13.1 Age differences**

431 First, we conducted two-sample t-tests to test for age differences in brain structure. In each  
432 of these models, we set the imaging modality (e.g., normalized, modulated gray matter volume  
433 segments) as the outcome variable and controlled for sex. In the gray matter and cerebellar  
434 volume models, we also controlled for head size (i.e., total intracranial volume). Also in the gray  
435 matter volume models only, we set the absolute masking threshold to 0.1 (Gaser and Kurth,  
436 2017) and used an explicit gray matter mask that excluded the cerebellum (because we analyzed  
437 cerebellar volume separately from "whole brain" gray matter volume; Section 2.8.3).

438 **2.13.2 Interaction of age group \* DTcost of gait**

439 Our primary analysis of interest tested for regions in which the relationship between brain  
440 structure and the DTcost of gait differed between young and older adults. We ran two-group t-test  
441 models and included the DTcost of gait speed or step time variability for young and older adults  
442 as covariates of interest. We tested for regions in which the correlation between brain structure  
443 and DTcost was greater for the young compared with the older adults, and where the correlation  
444 between brain structure and DTcost was lower for the young compared with the older adults. As  
445 above, we controlled for sex in all models, and we controlled for head size in the gray matter and  
446 cerebellar volume models.

447 **2.14 ROI Statistical Models**

448 We conducted ROI analyses in R. For each set of analyses, we applied the Benjamini-Hochberg  
449 FDR correction to the  $p$  values for the predictor(s) of interest (Benjamini and Hochberg, 1995).

450 **2.14.1 Age differences**

451 Similar to the above voxelwise models, we first ran linear models to test for age group differences  
452 in ROI volume or mean intensity, controlling for sex. We applied the FDR correction to the  $p$   
453 values for the age group predictor (i.e., the primary analysis of interest). *Post hoc*, we also  
454 FDR-corrected the  $p$  values for the sex predictor, to better interpret several statistically significant  
455 sex difference results.

456 **2.14.2 Interaction of age group \* DTcost of gait**

457 Also similar to above, we ran linear models testing for an interaction of age group with the  
458 DTcost of gait speed or step time variability, controlling for sex. We FDR-corrected the  $p$  values  
459 for the interaction term.

460 **2.15 Multiple Regression to Identify the Best Predictors of DTcost of Gait in Older Adults**

461 We used two stepwise multivariate linear regressions to directly compare the neural correlates  
462 of the DTcost of gait identified by the voxelwise and ROI analyses described above. We ran  
463 one model for the DTcost of gait speed, and one model for the DTcost of step time variability.  
464 We included only the older adults in these models because the older adults showed stronger  
465 relationships between brain structure and the DTcost of gait (whereas the young adults tended to  
466 show either a weak relationship or no clear relationship between brain structure and the DTcost  
467 of gait).

468 In each of the two full models, we included sex and values from the peak result coordinate for  
469 each voxelwise model that indicated a statistically significant age difference in the relationship  
470 between brain structure and the DTcost of gait as predictors. We also included ROI values  
471 as predictors in any cases where the linear model yielded a significant age group by DTcost  
472 interaction term. We used *stepAIC* (Venables et al., 1999) to produce a final model that retained  
473 only the best predictor variables; *stepAIC* selects a maximal model based on the combination of  
474 predictors that produces the smallest Akaike information criterion (AIC). Overall, this stepwise  
475 regression approach allowed us to fit the best models using brain structure to predict the DTcost  
476 of gait for the older adults.

## 477 **2.16 Comparison of Participant Characteristics and Testing Timeline**

478 There were no statistically significant differences between the age groups in sex, handedness,  
479 footedness, alcohol use, or hours of sleep prior to each testing session. There were also no age  
480 group differences in the number of days elapsed between the testing sessions or in the difference  
481 in start time for the sessions. Older adults did report higher body mass indices, less physical  
482 activity, lower balance confidence, and greater fear of falling compared with young adults. See  
483 Table 1 for complete demographic information.

## 484 **2.17 Age and Condition Differences in Performance**

485 Across both age groups, gait speed slowed and gait variability increased during WWT compared  
486 to NW (Table 2; Fig. S2). There was not a statistically significant difference in serial subtraction  
487 accuracy between the seated and WWT conditions (Table 2), though both young and older  
488 adults attempted fewer subtraction problems during the WWT conditions compared to the seated  
489 condition (Table 2; Fig. S2). Thus, across both age groups, subtraction speed decreased from  
490 single to dual task, but accuracy did not change.

491 Across both conditions, the young adults performed with higher accuracy compared with the  
492 older adults (Table 2). However, there were no statistically significant age group differences in  
493 the DTcost of walking or subtraction performance (i.e., there were no significant age group by  
494 condition interactions; 2; Fig. S2). That is, the magnitude of single to dual task decrements in gait  
495 speed and number of subtraction problems attempted, as well as the magnitude of the increase  
496 in gait variability, was similar for young and older adults.

## 497 **2.18 Comparison of Brain Structure Between Age Groups**

### 498 **2.18.1 $T_1$ -weighted MRI metrics**

499 Across the whole brain, older adults had significantly lower gray matter volume compared with  
500 young adults (Fig. 3). The greatest differences between young and older adults occurred in  
501 the bilateral pre- and postcentral gyri, temporal lobe, insula, and inferior portion of the frontal  
502 cortex. Cerebellar volume was lower for older compared with younger adults across most of the  
503 cerebellum, though there were no age differences in some regions, including the vermis and  
504 bilateral crus I (Fig. 3). Across the entire cortical surface, older adults had lower cortical thickness  
505 compared with young adults (Fig. 4). The largest age differences in cortical thickness occurred  
506 in the bilateral pre- and postcentral gyri and portions of the superior frontal cortex. Gyrification  
507 index was lower for older adults in the bilateral insula only. Cortical complexity was lower for older  
508 adults across portions of the bilateral insula, left middle frontal cortex, and posterior cingulate  
509 gyrus. Sulcal depth was reduced for older adults across the bilateral temporal lobes and insula,  
510 within the lateral fissure of the brain. Sulcal depth was higher for older compared with young  
511 adults across the superior frontal cortex, along the midline (Fig. 4).

## 512 **2.19 Diffusion MRI Metrics**

513 Compared with young adults, older adults showed lower FA<sub>t</sub>, lower AD<sub>t</sub>, higher RD<sub>t</sub>, and higher  
514 FW across almost the entire white matter skeleton (Fig. 5). There were some exceptions to this  
515 pattern, however, in portions of the superior corona radiata, corpus callosum (e.g., splenium),

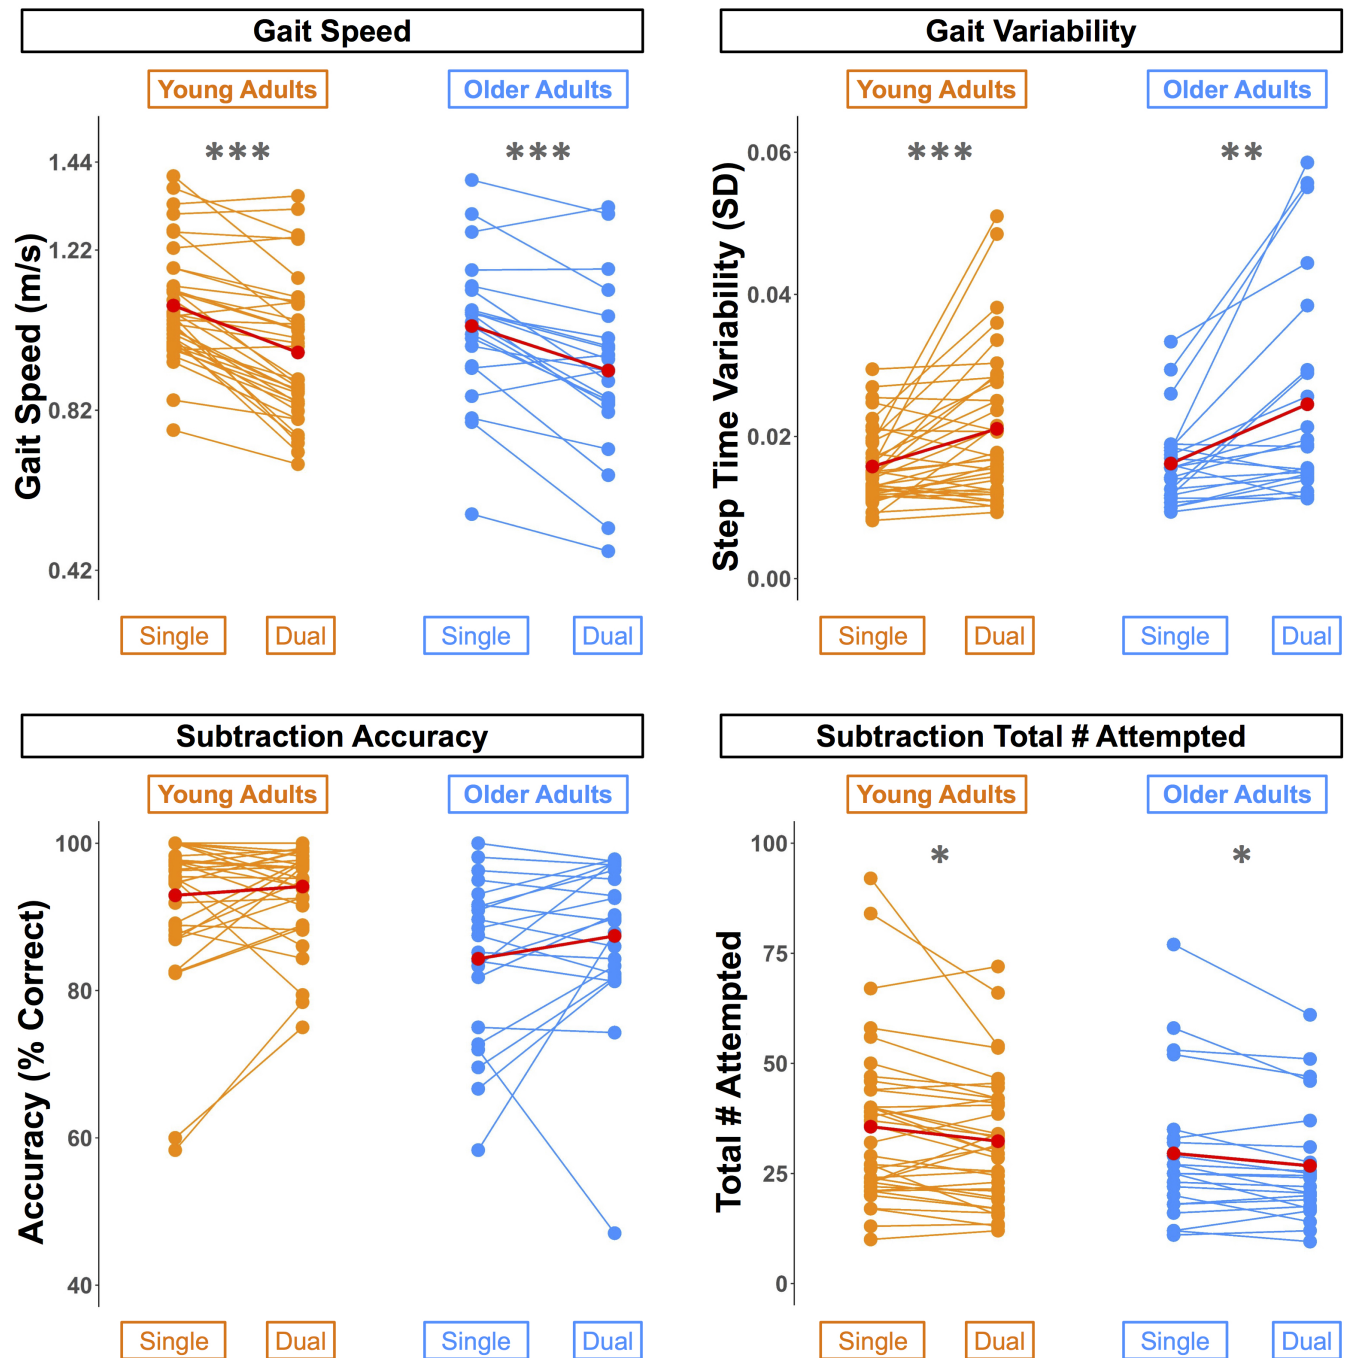

**Figure 2.** Differences in walking and subtraction performance during single versus dual task conditions. Gait and serial subtraction performance are depicted for each young (orange) and older (blue) adult. Each line represents one participant. Group means are shown in red. Across both age groups, gait speed slowed, gait variability increased, and number of subtraction problems attempted decreased from single to dual task conditions. \* $p_{FDR-corr} < 0.05$ , \*\* $p_{FDR-corr} < 0.01$ , \*\*\* $p_{FDR-corr} < 0.001$ .

516 internal capsule, and thalamic radiations in which older adults showed higher FAt, higher ADt,  
517 and lower RDt compared with young adults.

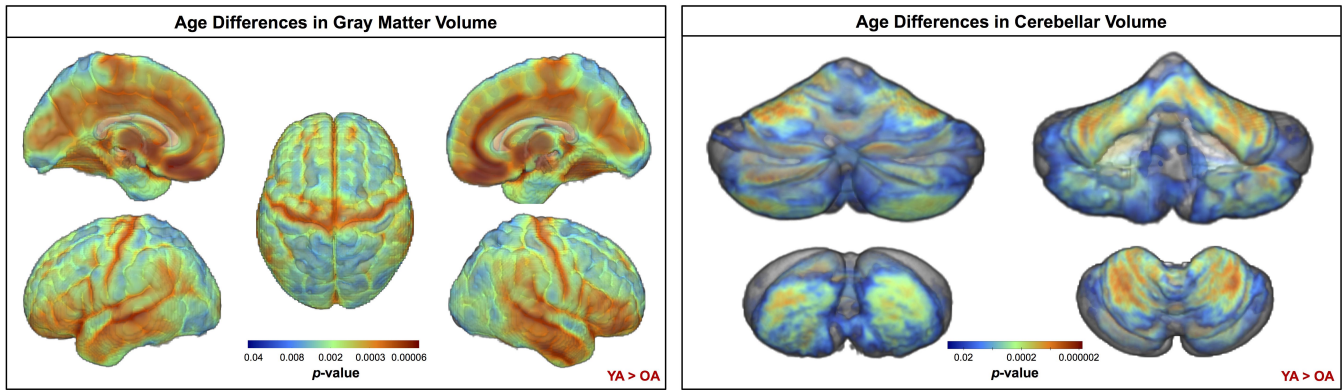

**Figure 3.** Age differences in gray matter and cerebellar volume. Increasingly warm colors indicate regions where young adult volumes were greater than older adult volumes. Results are overlaid onto a whole brain MNI-space template (left) and onto the SUI cerebellar template (right).  $p_{FWE-corr} < 0.05$ .

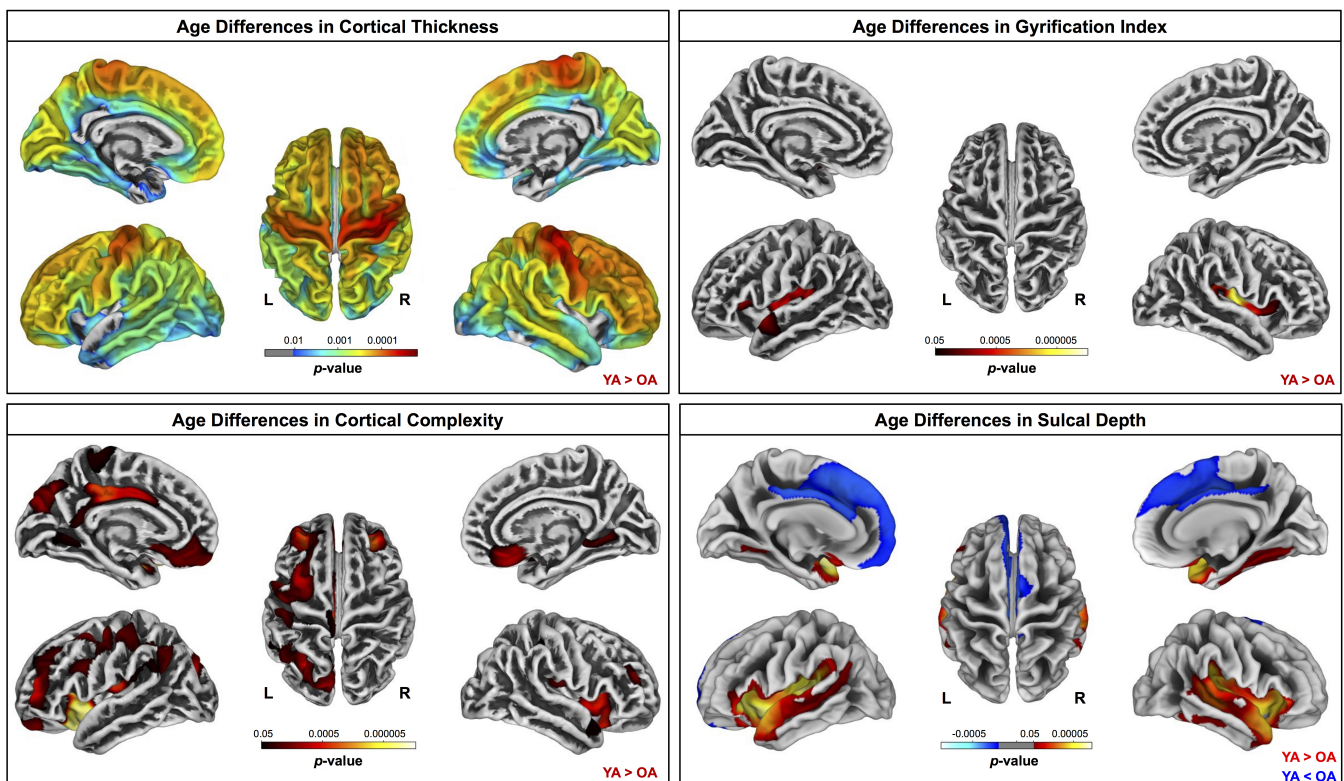

**Figure 4.** Age differences in surface measures. Warm colors indicate regions where young adult values were greater than older adult values. Cool colors indicate regions where young adult values were lower than older adult values. Results are overlaid onto CAT12 standard space templates. L = left; R = right.  $p_{FWE-corr} < 0.05$ .



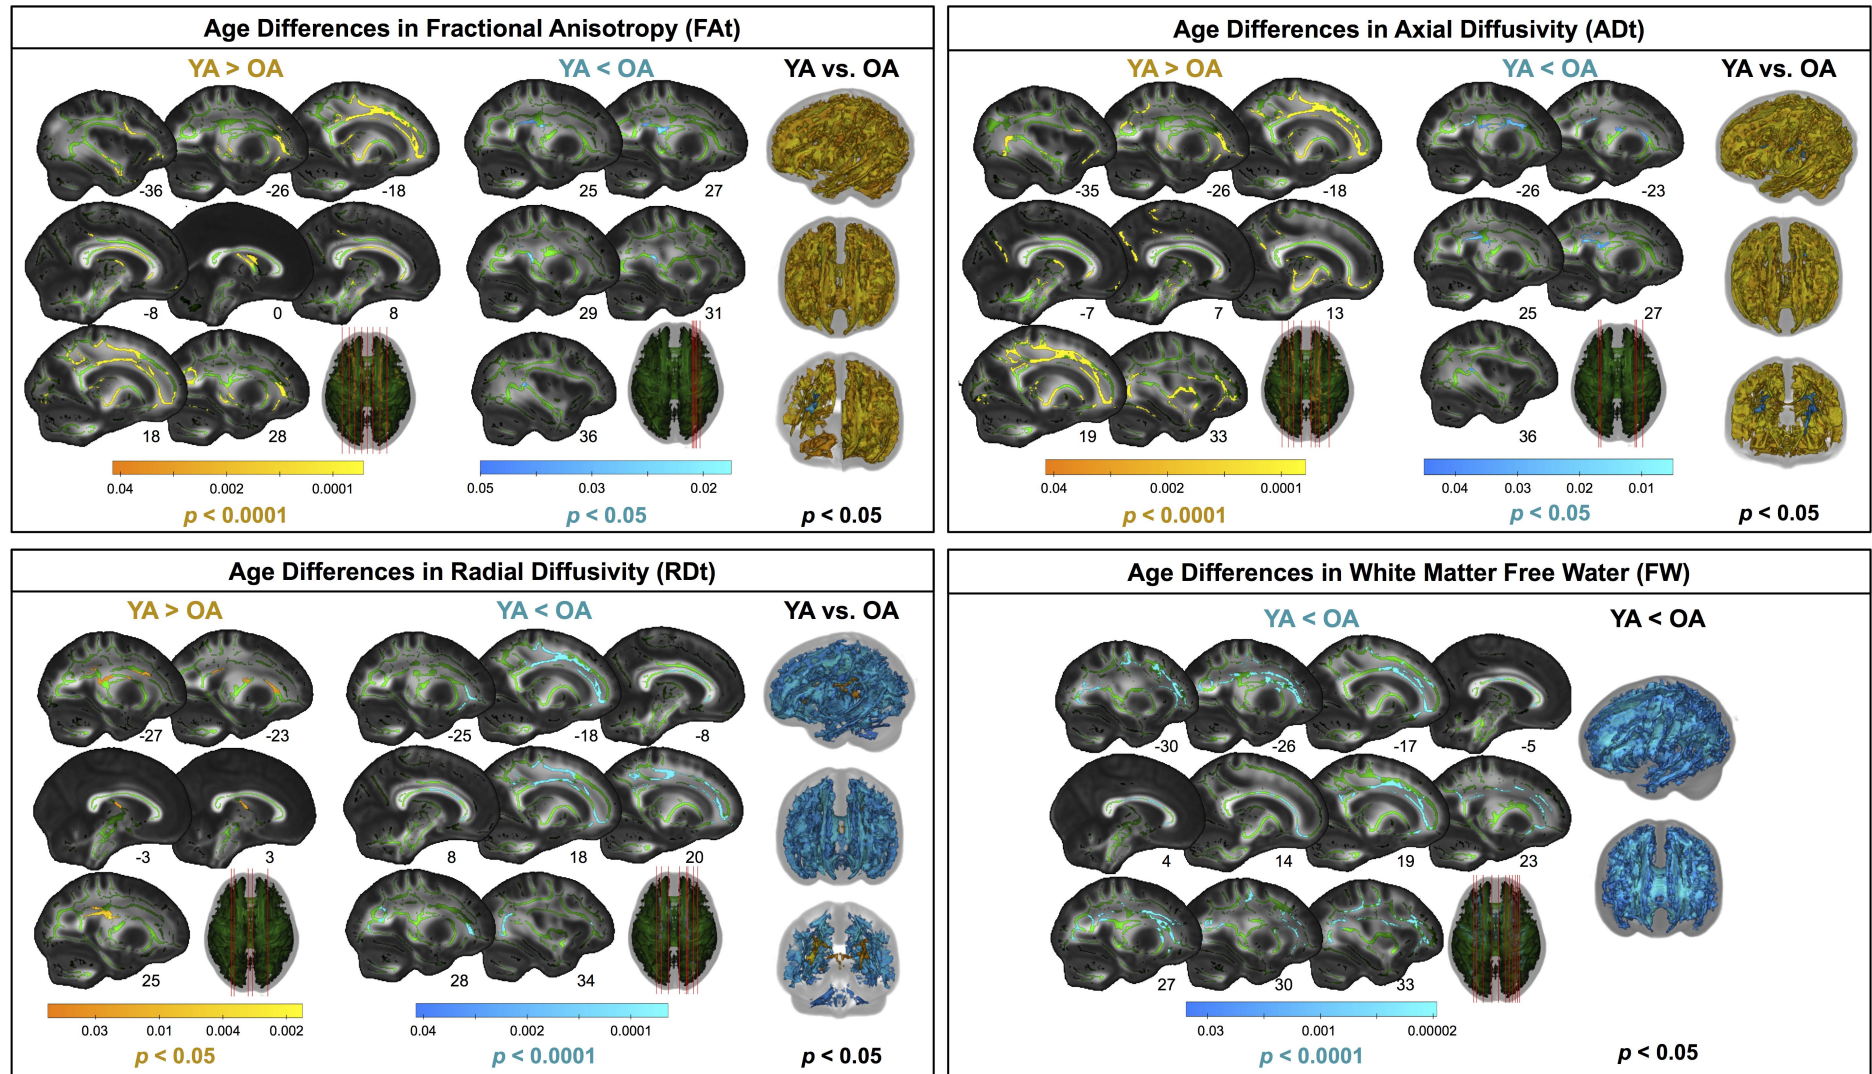

**Figure 5.** Age differences in FW-corrected white matter microstructure. Warm colors indicate regions where young adult values were greater than older adult values. Cool colors indicate regions where young adult values were lower than older adult values. Results are shown on the FMRIB58 FA template with the group mean white matter skeleton (green) overlaid. Age differences at  $p_{FWE-corr} < 0.05$  covered almost the entire white matter skeleton; these results are depicted in the rightmost column of each panel. The left portion of each panel depicts more conservative statistical thresholding (noted under each colorbar) to better illustrate which regions showed the most pronounced age differences.

518 **2.20 ROIs**

519 Lateral ventricular volume was higher for older compared with younger adults (Table S1; Fig.  
 520 S3). Older adults exhibited lower gray matter volume in all ROIs except for the globus pallidus  
 521 and higher FW in all ROIs except for postcentral gyrus (Table S1; Fig. S4). Older adults had lower  
 522 hippocampal volume across each of the three hippocampal ROIs (Table S1; Fig. S5). In several  
 523 regions, pooling across both age groups, females had higher gray matter volume (thalamus) and  
 524 FW (pre- and postcentral gyri and thalamus) compared with males.

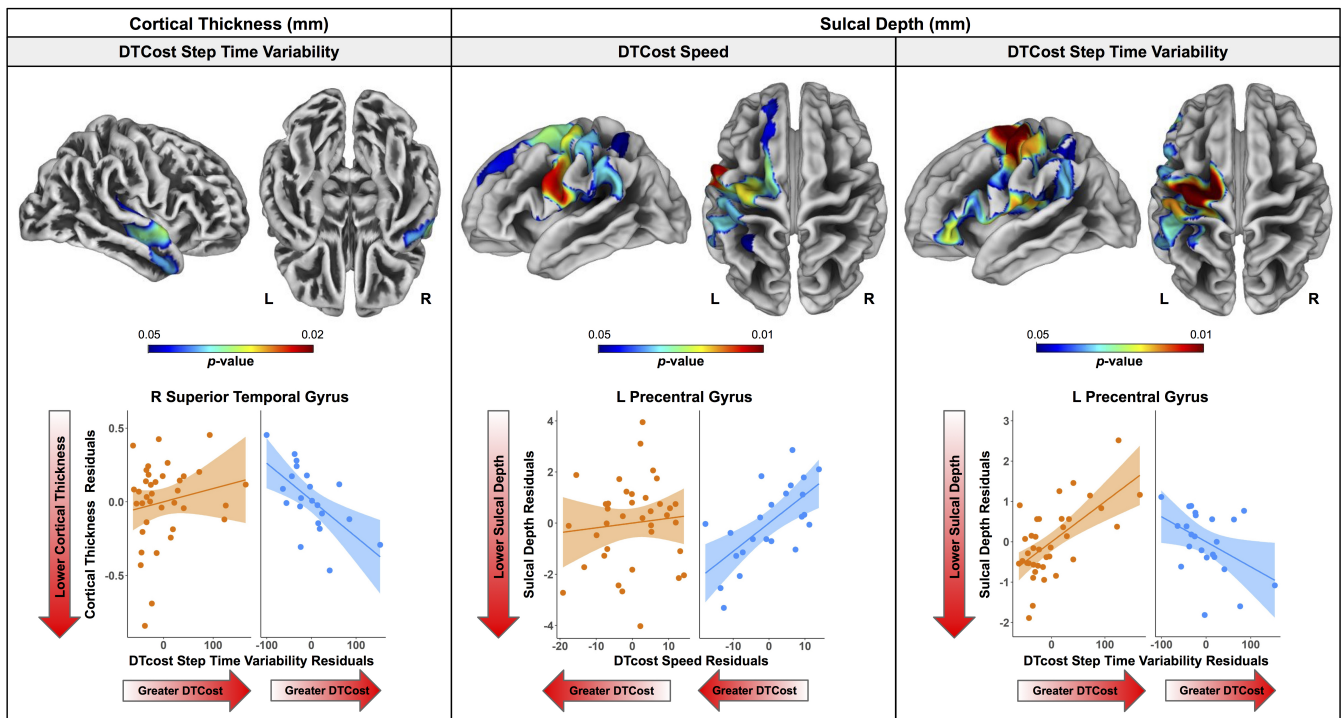

**Figure 6.** Age differences in the relationship of surface metrics with the DTcost of gait. Top. Regions showing statistically significant ( $p_{FWE-corr} < 0.05$ ) age group differences in the relationship of cortical thickness (left) and sulcal depth (middle, right) with the DTcost of gait speed and step time variability. Warmer colors indicate regions of greater age differences in brain-behavior correlations. Results are overlaid onto CAT12 standard space templates. L = left; R = right. Bottom. Surface values for the peak result coordinate for each model are plotted against DTcost of gait to illustrate examples of the relationships identified by the voxelwise statistical tests. The fit line and confidence interval shading are included only to aid visualization of these relationships. We plotted the residuals instead of the raw values here to adjust for the effects of the sex covariate included in each model.

525 **2.21 Age Differences in the Relationship of Brain Structure with the DTcost of Gait Speed**

526 There were no statistically significant age group by DTcost of gait speed interactions for gray  
 527 matter or cerebellar volume. However, for the older adults, shallower sulcal depth across the  
 528 sensorimotor, supramarginal, and superior frontal and parietal cortices was associated with  
 529 greater DTcost of gait speed (Fig. 6; Table 3). That is, those older adults who showed the largest  
 530 decreases in gait speed from single to dual task also had the shallowest sulcal depth across  
 531 these regions. Young adults did not exhibit a clear relationship between sulcal depth in these  
 532 regions and the DTcost of gait speed. There were no statistically significant age group differences

533 in the correlation of cortical thickness, cortical complexity, or gyrification index with the DTcost of  
534 gait speed.

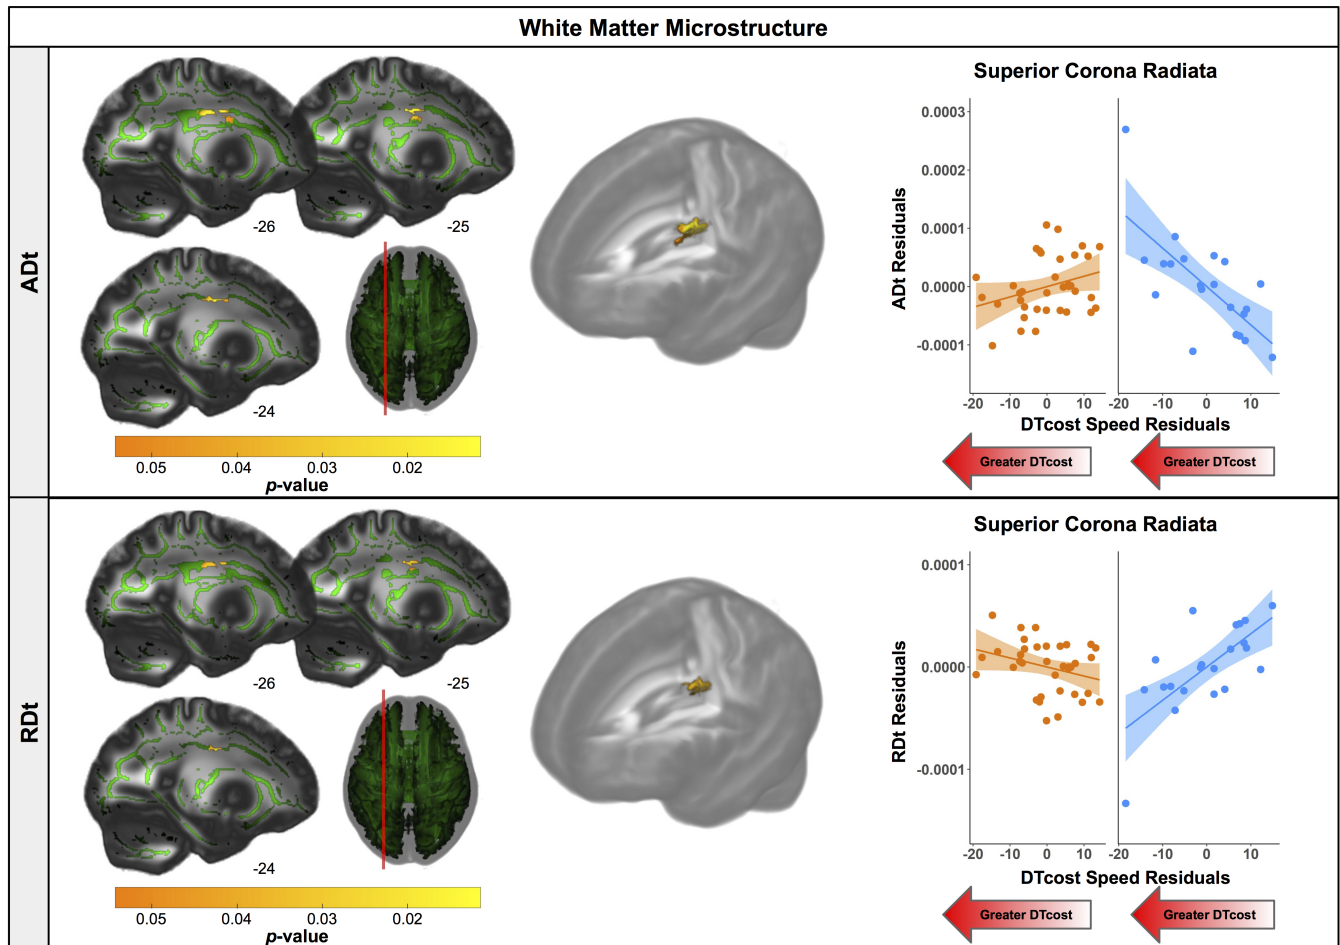

**Figure 7.** Age differences in the relationship of FW-corrected white matter microstructure with the DTcost of gait speed. Left. Regions showing statistically significant ( $p_{FW E-corr} < 0.05$ ) age group differences in the relationship of ADt (top) and RDt (bottom) with the DTcost of gait speed. Warmer colors indicate regions of greater age differences. Results are shown on the FMRIB58 FA template with the group mean white matter skeleton (green) overlaid. Right. ADt and RDt values for the peak result coordinate for each model are plotted against the DTcost of gait speed to illustrate examples of the relationships identified by the voxelwise statistical tests. The fit line and confidence interval shading are included only to aid visualization of these relationships. We plotted the residuals instead of the raw values here to adjust for the effects of the sex covariate included in each model.

535 There were age differences in the relationship between DTcost of gait speed and both ADt and  
536 RDt in portions of the left superior corona radiata involving the superior longitudinal fasciculus and  
537 corticospinal tract (Fig. 7; Table 4). For the older adults only, higher ADt and lower RDt in these  
538 regions was associated with greater slowing of gait speed from single to dual task conditions.  
539 Young adults showed no relationship between ADt or RDt in these regions and DTcost of gait  
540 speed. There were no statistically significant age group differences in the correlation of FAt or  
541 FW with the DTcost of gait speed.

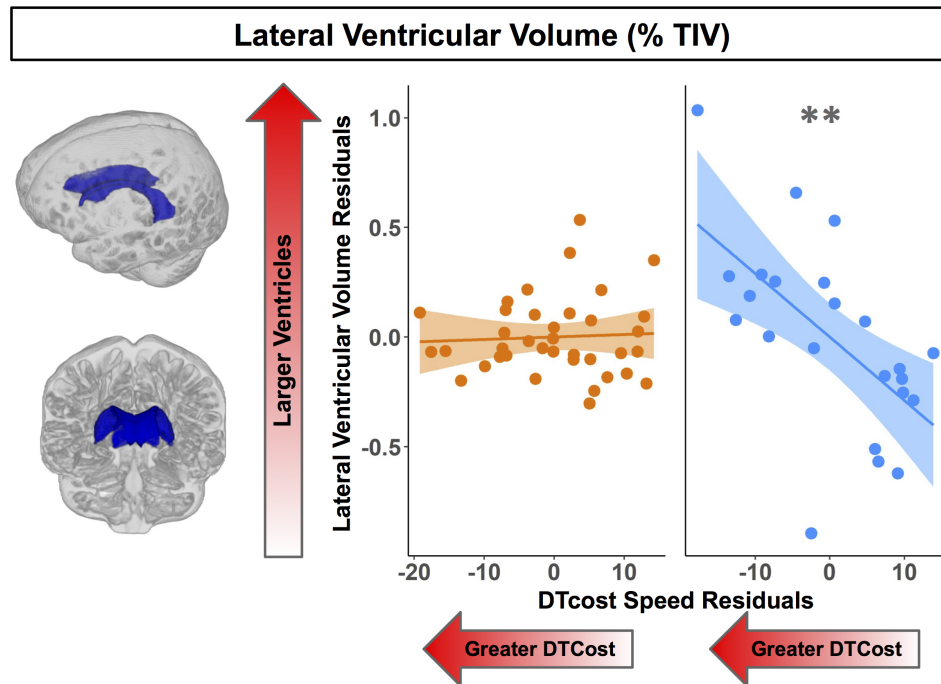

**Figure 8.** Age differences in the relationship of lateral ventricular volume with the DTcost of gait speed. Left. Here we depict the lateral ventricular volume mask for a single exemplar participant overlaid onto that participant's native space cerebrospinal fluid segment. Right. Lateral ventricular volume residuals (expressed as a percentage of total intracranial volume) are plotted against the DTcost of gait speed. We plotted the residuals instead of the raw values here to adjust for the effects of the sex covariate included in the model.  $**p_{FDR-corr} < 0.01$ .

542 For older adults only, larger lateral ventricular volume was associated with greater decreases in  
543 gait speed from single to dual task walking (Fig. 8; Table 5). There was no relationship between  
544 lateral ventricular volume and DTcost of gait speed for young adults. Older adult relationships  
545 between DTcost of gait speed with several other ROIs (i.e., thalamus gray matter volume ( $p =$   
546  $0.025$ ;  $p_{FDR-corr} = 0.172$ ) and parahippocampal cortex volume ( $p = 0.045$ ;  $p_{FDR-corr} = 0.208$ ))  
547 did not survive FDR correction. There were no other statistically significant interactions between  
548 age group and DTcost of gait speed for the remaining ROIs.

## 549 2.22 Age Differences in the Relationship of Brain Structure with the DTcost of Step Time 550 Variability

551 There were no statistically significant age group by DTcost of step time variability interactions for  
552 gray matter or cerebellar volume. For older adults, thinner temporal lobe cortex was associated  
553 with greater DTcost of step time variability (Fig. 6; 6). That is, those older adults with the thinnest  
554 temporal cortex also showed the greatest increase in step time variability from single to dual  
555 task. Young adults showed a weak opposite relationship between temporal cortex thickness and  
556 the DTcost of step time variability. In addition, those older adults with shallower sulcal depth  
557 across the sensorimotor, supramarginal, insular, and superior frontal and parietal cortices also  
558 showed a greater DTcost of step time variability (Fig. 6; Table 3). Young adults showed a weak  
559 opposite relationship between sulcal depth in these regions and the DTcost of step time variability.  
560 There were no statistically significant age differences in the relationship of cortical complexity or  
561 gyrification index with the DTcost of step time variability.

562 There were no statistically significant age differences in the relationship between the DTcost of  
563 step time variability and FW-corrected white matter microstructure. Greater DTcost of step time  
564 variability was associated with lower parahippocampal cortex volume for the older adults, though  
565 this relationship did not survive FDR correction ( $p = 0.039$ ;  $p_{FDR-corr} = 0.433$ ). There were no  
566 statistically significant interactions between age group and the DTcost of step time variability for  
567 the remaining ROIs (Table S2).

## 568 **2.23 Multiple Regression to Identify the Best Predictors of DTcost of Gait in Older Adults**

569 For the DTcost of gait speed full model, we entered each participant's left precentral gyrus  
570 sulcal depth and superior longitudinal fasciculus ADt and RDt (extracted from the peak region  
571 resulting from each voxelwise model). We also entered lateral ventricular volume (expressed as  
572 a percentage of total intracranial volume) and sex. The stepwise regression returned a model  
573 containing only sulcal depth, ADt, and sex, indicating that the combination of these three variables  
574 best predicts the DTcost of gait speed for older adults (Table 7).

575 For the DTcost of step time variability full model, we entered each participant's right superior  
576 temporal gyrus cortical thickness and left precentral gyrus sulcal depth, as well as sex. The  
577 stepwise regression returned a model containing only cortical thickness, indicating that this  
578 surface metric best predicts the DTcost of step time variability for older adults (Table 7).

## 3 DISCUSSION

579 We examined a comprehensive set of structural MRI metrics in relation to dual task walking in older  
580 adults. We identified widespread brain atrophy for older adults; across imaging modalities, we  
581 found the most prominent age-related atrophy in brain regions related to sensorimotor processing.  
582 Moreover, though the DTcost of gait speed and variability did not differ by age group, we identified  
583 multiple age differences in the relationship between brain structure and DTcost of gait. These  
584 age differences occurred both in regional metrics such as the temporal cortices and white matter  
585 tracts involved in motor control, and also for more general markers of brain atrophy, such as the  
586 lateral ventricles. We selected dual task walking performance as our outcome metric, as it is  
587 more predictive of falls in aging than single task walking (Ayers et al., 2014; Gillain et al., 2019;  
588 Halliday et al., 2018; Johansson et al., 2016; Verghese et al., 2017) and more related to real-world  
589 mobility (Hillel et al., 2019). Together, these results provide greater scientific understanding of the  
590 structural correlates of dual task walking in aging and highlight potential targets for future mobility  
591 interventions.

### 592 **3.1 No Age Differences in the DTcost of Gait**

593 Gait speed slowed, gait variability increased, and total number of subtraction problems  
594 attempted decreased between the single and dual task conditions. However, there were no  
595 age differences in the DTcost of gait speed, step time variability, or serial subtraction performance.  
596 That is, older adults did not exhibit a disproportionately larger decrease in gait speed or increase  
597 in gait variability between the NW and WWT conditions. Older adults also did not exhibit a  
598 disproportionately larger decrease in the total number of subtraction problems attempted between  
599 the seated and WWT conditions. While previous literature has mostly reported larger DTcosts  
600 to gait in older adults (e.g., for review see Al-Yahya et al., 2011; Beurskens and Bock, 2012),  
601 other previous work has found no age differences in the DTcost of gait speed (Holtzer et al.,

602 2011). Moreover, much of this prior work has focused on comparisons of aging with pathologies  
603 such as cognitive impairment (Montero-Odasso et al., 2012; Pettersson et al., 2007), rather  
604 than comparisons of young and older adults. In our sample of relatively high-functioning older  
605 adults, the lack of group differences in the DTcost of gait and subtraction performance is perhaps  
606 unsurprising. Of note, we do believe that our cognitive task (serial 7s) was sufficiently difficult  
607 to divide attention between walking and talking for both age groups, as our task was more  
608 difficult than other common paradigms, such as reciting alternate letters of the alphabet (Ayers  
609 et al., 2014; Tripathi et al., 2019; Verghese et al., 2007). This lack of group differences in  
610 behavioral performance then frames our brain structure analyses to probe the neural correlates of  
611 preservation of function in aging. Thus, we can explore the neural correlates that might underlie  
612 compensation for normal brain aging and permit successful maintenance of dual task walking  
613 abilities into older age.

## 614 **3.2 Age Differences in Brain Structure**

### 615 **3.2.1 Gray matter volume, cerebellar volume, and cortical thickness**

616 Overall, we found evidence of widespread brain atrophy for older compared with young adults.  
617 This observation is well in line with previous literature, which has similarly identified widespread  
618 age differences in brain gray matter volume (e.g., Lemaitre et al., 2012; Raz et al., 2010; Storsve  
619 et al., 2014), cerebellar volume (e.g., Bernard et al., 2015; Han et al., 2020; Koppelmans et al.,  
620 2017; Raz et al., 2010), and cortical thickness (e.g., Fjell et al., 2009b; Lemaitre et al., 2012; Salat  
621 et al., 2004; Storsve et al., 2014; Thambisetty et al., 2010; van Velsen et al., 2013). Many reports  
622 suggest that age-related atrophy occurs disproportionately in the frontal cortices (e.g., Fjell et al.,  
623 2009a; Lemaitre et al., 2012; Salat et al., 2004; Thambisetty et al., 2010). However, our finding  
624 of the most prominent age differences in gray matter volume and thickness of the sensorimotor  
625 cortices (and comparatively less age difference in the frontal cortices) fits with recent work which  
626 identified the greatest age differences (gray and white matter atrophy, demyelination, FW, and iron  
627 reduction) within the sensorimotor cortices in a large ( $n = 966$ ) sample of middle- to older-aged  
628 adults (Taubert et al., 2020). Taubert and colleagues suggested that the particular age differences  
629 in sensorimotor cortex structure could be either a cause or an effect of age-related impairments  
630 to motor control (Papegaaij et al., 2014; Taubert et al., 2020).

### 631 **3.2.2 Additional surface metrics**

632 While previous reports indicate that patterns of cortical thinning with aging largely mirror age-  
633 related changes in gray matter volume, the effects of aging on the other surface metrics studied  
634 here (i.e., sulcal depth, cortical complexity, and gyrification index) are not as well characterized. A  
635 couple of prior reports have indicated that, with aging, sulci become wider and shallower (Jin  
636 et al., 2018; Rettmann et al., 2006), and the cortex becomes less complex (Madan and Kensinger,  
637 2016), with lower gyrification indices (Cao et al., 2017; Hogstrom et al., 2013; Lamballais et al.,  
638 2020; Madan, 2021; Madan and Kensinger, 2018). Our findings fit with these patterns, although  
639 across each of these metrics, we found the most prominent age differences within the lateral  
640 sulcus, whereas some previous work identified the largest age differences in other regions such  
641 as the central sulcus (cortical thickness; Rettmann et al., 2006), parietal lobe (sulcal depth; Jin  
642 et al., 2018), and frontal lobe (cortical complexity; Madan and Kensinger, 2016; and gyrification  
643 index; Lamballais et al., 2020). Methodological discrepancies might explain these differences; for

644 instance, Jin et al. (2018) reported sulcal depth differences in middle versus older aged adults,  
645 rather than young compared with older adults.

### 646 **3.2.3 FW-corrected white matter microstructure**

647 Only one previous study has directly compared FW corrected white matter microstructure  
648 between healthy young and older adults (Chad et al., 2018), despite that FW-corrected diffusion  
649 metrics have significantly higher test-retest reliability than conventional diffusion-weighted metrics  
650 (Albi et al., 2017), and that FW correction allows for separation of atrophy effects (i.e., increased  
651 extracellular fluid) from changes to the structure of the remaining white matter. Our findings  
652 here of age differences in FW-corrected white matter microstructure largely mirror those of  
653 Chad et al. (2018). As anticipated, we found lower FAt and ADt, paired with higher RDt and FW  
654 across almost the entire white matter skeleton. This pattern fits with previous literature examining  
655 FW-uncorrected white matter as well: prominent declines in FA, typically interpreted as decreased  
656 white matter microstructural organization and integrity (Bennett et al., 2010; Sexton et al., 2014)  
657 although also reflective of crossing fiber integrity (Chad et al., 2018), decreases in AD, interpreted  
658 as accumulation of debris or metabolic damage with age (Madden et al., 2012; Pierpaoli et al.,  
659 2001; Song et al., 2003), and increases in RD, interpreted as decreased myelin integrity or  
660 demyelination (Madden et al., 2012; Song et al., 2002, 2005).

661 After applying the FW correction to our data, we found several areas of opposite age differences,  
662 quite similar to the results described by Chad et al. (2018). Specifically, we observed a seemingly  
663 paradoxical finding in portions of the superior corona radiata, corpus callosum (e.g., splenium),  
664 internal capsule, and thalamic radiations, in which FAt and ADt were higher and RDt was lower for  
665 the older compared with the young adults. In addition to the report by Chad et al. (2018), several  
666 large datasets of normal aging (examining FW-uncorrected white matter) also corroborate this  
667 finding (de Groot et al., 2016; Miller et al., 2016; Sexton et al., 2014). Previous interpretations of  
668 this increased FA include selective degeneration of non-dominant tracts paired with a relative  
669 sparing of the primary bundle at fiber crossings (Chad et al., 2018). In particular, in this region, the  
670 corona radiata, internal capsule, and corpus callosum all cross the corticospinal tract (Tuch et al.,  
671 2003). The diffusion tensors in these regions indicate that the corticospinal tract is the principal  
672 fiber (Chad et al., 2018); *bedpostx* tractography analyses by Chad et al. (2018) suggest that the  
673 superior longitudinal fasciculus crosses the corona radiata in this region, and that the thalamic  
674 radiations also cross the corticospinal tract in this region of the internal capsule. Thus, as the  
675 superior longitudinal fasciculus and thalamic radiations are thought to degenerate substantially  
676 with age (Cox et al., 2016), while the corticospinal tract is thought to be relatively spared in aging  
677 (Jang and Seo, 2015), it is likely that the selective degeneration of non-dominant fibers in these  
678 locations is driving this seemingly paradoxical finding in the older adults.

### 679 **3.2.4 Structural ROIs**

680 We selected the ROIs used in this study because of their purported roles in mobility function (i.e.,  
681 the sensorimotor cortices, basal ganglia, and hippocampus; Beauchet et al., 2015, 2019; Callisaya  
682 et al., 2013). We also examined the lateral ventricles as a more general metric of subcortical  
683 atrophy. As anticipated, almost all of these ROIs showed significant age differences (i.e., reduced  
684 gray matter volume, increased FW, and increased ventricular volume). This fits with the existing  
685 literature reporting ventricular expansion in older age (Carmichael et al., 2009; Fjell et al., 2009a).  
686 However, it is interesting to note that FW fractional volumes showed less pronounced age

687 differences compared to gray matter volumes. This could indicate that microstructural FW does  
688 not change as markedly with normal aging, in comparison to macrostructural gray matter tissue.  
689 Comparison of FW fractional volumes to prior aging work is difficult, as most previous papers  
690 report increased subcortical (e.g., substantia nigra) FW in pathological aging (e.g., Parkinson's  
691 disease) compared with controls (Guttuso et al., 2018; Yang et al., 2019), as opposed to reporting  
692 comparisons of healthy young and older adults.

### 693 **3.3 Interaction of Age Group with the DTcost of Gait**

#### 694 **3.3.1 Gray matter and cerebellar volumes**

695 We did not identify any statistically significant age group differences in the relationship between  
696 the DTcost of gait speed or variability and regional gray matter volume. While extensive previous  
697 literature has examined relationships of single task overground walking with gray matter and  
698 cerebellar volume (e.g., Beauchet et al., 2015; Callisaya et al., 2013; Demnitz et al., 2017;  
699 Dumurgier et al., 2012; Rosano et al., 2007), comparatively less work has examined such  
700 relationships with dual task walking (Allali et al., 2019; Lucas et al., 2019; Ross et al., 2021;  
701 Tripathi et al., 2019; Wagshul et al., 2019). Further, these studies had methodological differences  
702 from our work (e.g., they used an alphabet task instead of serial 7s as the cognitive task).  
703 Moreover, it could be that we did not identify gray matter volume associations with the DTcost of  
704 gait because other measures (e.g., surface-based morphometry metrics) may provide a more  
705 sensitive correlate of behavior as compared with volume metrics. Surface-based metrics have  
706 been found to have several advantages over volume-based metrics (Hutton et al., 2009; Lemaitre  
707 et al., 2012; Winkler et al., 2010), including more accurate spatial registration (Desai et al., 2005),  
708 sensitivity to surface folding, and independence from head size (Gaser and Kurth, 2017).

#### 709 **3.3.2 Surface metrics**

710 We identified several age differences in brain-behavior relationships for two surface metrics:  
711 cortical thickness and sulcal depth. Only a few previous studies have examined relationships  
712 between cortical thickness and dual task walking in aging (Maidan et al., 2021; Ross et al., 2021),  
713 and, to our knowledge, no prior literature has examined sulcal depth in relation to dual task  
714 walking in aging. In the present work, we identified a relationship between thinner temporal cortex  
715 and greater increases in step time variability from single to dual task walking for older adults.  
716 Interestingly, the superior, middle, and transverse temporal gyri where we identified this result  
717 have functions in visual perception (Ishai et al., 1999; Miyashita, 1993), multimodal sensory  
718 integration (Downar et al., 2000; Mesulam, 1998), and spatial navigation (Howard et al., 2005).  
719 Given these functional roles, it is plausible that these regions of the temporal cortex would play a  
720 role in gait control.

721 Moreover, this region of temporal cortex is not one in which we found prominent age-related  
722 cortical thinning. Thus, it is possible that this temporal region plays a compensatory role in  
723 aging, to compensate for the substantial cortical thinning with aging that we identified in classical  
724 sensorimotor brain regions, such as the pre- and postcentral gyri. This notion fits with the  
725 hypothesis of neural inefficiency in aging (Fetrow et al., 2021b; Zahodne and Reuter-Lorenz,  
726 2019), which suggests that, when neural resources become limited (as with age-related atrophy  
727 of the sensorimotor cortices), different neural resources (e.g., in this case, the temporal cortices)  
728 are used to compensate and maintain performance (e.g., as seen in the lack of age differences



729 in the DTcost of gait). This also results in a stronger relationship between temporal lobe structure  
730 and dual task walking, which only emerges in older age when these neural resources start to  
731 become limited. This interpretation fits with a recent report of an association between lower  
732 cortical thickness and greater increases in prefrontal oxygenation from single to dual task  
733 walking, with no effect on performance (Ross et al., 2021). The study authors suggested that  
734 older adults with the poorest neural resources (i.e., the thinnest cortex) also required the most  
735 compensation from alternative brain regions (i.e., the greatest increases in prefrontal oxygenation)  
736 to maintain performance. One caveat to this interpretation, however, is that hypotheses of neural  
737 compensation with aging were largely developed in relation to functional, not structural, MRI  
738 data—though our data appear to follow a similar pattern.

739 We also identified two relationships between sulcal depth in aging and greater DTcost of  
740 gait speed and variability for older adults. Similar to cortical thickness, these brain-behavior  
741 relationships did not fall within the prominent regions of age difference in sulcal depth (i.e., the  
742 bilateral temporal lobes and insula), and instead spanned the sensorimotor, supramarginal,  
743 superior frontal and parietal cortices. Thus, these sulcal depth findings could similarly represent  
744 an age-related compensation. That is, in compensation for shallowing of other cortical regions  
745 in aging, those who retained deeper sulci into older age were also able to maintain the best  
746 functional walking performance.

747 Of note, while young adults did not show a clear relationship between cortical thickness or  
748 sulcal depth and DTcost of gait speed, young adults did exhibit a relationship between greater  
749 sulcal depth and lower DTcost of step time variability (which is in the opposite direction of what  
750 we might expect). Greater step time variability is clearly related to negative outcomes for older  
751 adults, such as higher fall risk (Callisaya et al., 2011). However, the case is less clear for young  
752 adults (Beauchet et al., 2009; Moe-Nilssen et al., 2010). For instance, higher gait variability for  
753 younger adults can indicate more stable gait (Beauchet et al., 2009). Additionally, it could be that  
754 young adults were using a different strategy to complete the task.

### 755 **3.3.3 FW-corrected white matter microstructure**

756 Several prior studies have linked lower white matter diffusivity metrics to poorer overground  
757 walking (e.g., Bruijn et al., 2014; Tian et al., 2016; Verlinden et al., 2016) and dual task walking in  
758 older adults (e.g., Ghanavati et al., 2018). However, though one prior study identified relationships  
759 between FW-corrected white matter microstructure and cognition in normal aging (Gullett et al.,  
760 2020), to our knowledge, no previous work has examined how FW-corrected white matter  
761 microstructure relates to mobility in older adults.

762 We identified two relationships in which higher ADt and lower RDt were associated with worse  
763 dual task performance, i.e., greater slowing of gait speed from single to dual task conditions. This  
764 is perhaps the opposite pattern from what one might expect, as lower ADt is often associated  
765 with accumulation of debris or metabolic damage (Madden et al., 2012; Pierpaoli et al., 2001;  
766 Song et al., 2003), and higher RDt is interpreted as decreased myelin integrity or demyelination  
767 (Madden et al., 2012; Song et al., 2002, 2005). However, this result occurred in the superior  
768 corona radiata, where older adults had higher ADt and lower RDt than young adults (see Section  
769 3.2.3). It could be that, in these white matter regions, the poorest performing older adults also  
770 have the greatest degeneration of crossing fibers, such as the superior longitudinal fasciculus  
771 crossing the corticospinal tract. As the superior longitudinal fasciculus is implicated in functions

772 such as motor control, proprioception, and visuospatial attention and awareness (Amemiya and  
773 Naito, 2016; Rodríguez-Herreros et al., 2015; Shinoura et al., 2009; Spina et al., 2006), it is  
774 logical that deterioration of this pathway could negatively impact dual task walking in aging.

### 775 **3.3.4 Structural ROIs**

776 We identified a relationship between larger lateral ventricular volume and greater DTcost of  
777 gait speed for older but not younger adults. This fits with some previous work that has linked  
778 larger ventricular volume with higher gait variability (Annweiler et al., 2014) and slower gait  
779 speed (Camicioli et al., 1999) in older adults. However, it is surprising that we did not identify  
780 relationships between DTcost of gait and the remaining structural ROIs, as previous work  
781 has linked sensorimotor (Rosano et al., 2007), basal ganglia (Dumurgier et al., 2012), and  
782 hippocampal (Beauchet et al., 2015) volumes to gait in aging. Our results thus suggest that  
783 generalized atrophy of subcortical structures, as opposed to atrophy of a single subcortical  
784 structure, is a better correlate of dual task locomotor function in aging.

### 785 **3.4 Best Models of DTcost of Gait in Aging**

786 Across the multimodal neuroimaging markers examined, left precentral gyrus sulcal depth, left  
787 superior longitudinal fasciculus ADt, and sex were the best predictors of DTcost of gait speed for  
788 older adults, and right superior temporal gyrus cortical thickness represented the best predictor  
789 of DTcost of step time variability. Given the purported benefits of surface metrics over volumetric  
790 measures (Desai et al., 2005; Hutton et al., 2009; Lemaitre et al., 2012; Winkler et al., 2010),  
791 the inclusion of sulcal depth and cortical thickness in these final models is perhaps unsurprising.  
792 Further, by minimizing partial volume effects resulting from white matter atrophy with aging,  
793 FW-corrected measures should provide greater sensitivity than traditional diffusion metrics for  
794 detecting true microstructural effects in aging cohorts. Thus, it is also perhaps unsurprising that  
795 ADt in a region (superior longitudinal fasciculus) particularly affected by aging (Cox et al., 2016)  
796 was also a good predictor of DTcost of gait in aging. Females showed larger DTcosts of gait  
797 speed, though previous literature has only infrequently reported sex differences in dual task  
798 walking in older adults (e.g., Hollman et al., 2011b; MacAulay et al., 2014; Yogev-Seligmann et al.,  
799 2010), and findings were conflicting.

800 Despite these results, we would also like to note that these surface and white matter metrics are  
801 complicated measures and that, although these produced the best models of DTcost of gait, it is  
802 worth mentioning that lateral ventricular volume also represented a good predictor of DTcost of  
803 gait speed in aging. Ventricular volume can be extracted easily by applying automated algorithms  
804 to common  $T_1$ -weighted MRI sequences, and provides a useful general metric of subcortical  
805 atrophy, which our data suggest contributes functionally to gait speed slowing in aging.

### 806 **3.5 Limitations**

807 Our cross-sectional approach precluded us from tracking concurrent changes in brain structure  
808 and mobility over time. Additionally, our statistical models focused on the interaction of age group  
809 with the DTcost of gait, in order to identify regions where the relationship between brain structure  
810 and DTcost of gait differed for young versus older adults. We did not test for regions where brain  
811 structure related to DTcost of gait in the same manner for each age group. Such models may  
812 have uncovered more brain-behavior relationships in classical motor control regions, such as  
813 pre- and postcentral gyrus and the cerebellum. However, this was not a focus of the present

814 work. Instead, our primary goal was to understand what brain regions contributed differently to  
815 maintenance of dual task walking in older age, to probe age-related shifts in the cortical control of  
816 gait and potential compensatory processes. In addition, we did not test for relationships between  
817 brain structure and subtraction performance. Subtraction accuracy did not differ between single  
818 and dual task conditions (i.e., most DTcost scores were close to 0) and thus it would not have  
819 made sense to assess brain-behavior relationships in this case. The total number of subtraction  
820 problems attempted was lower for both age groups during single compared to dual task, though  
821 this difference was less pronounced compared to the gait metrics. Future work could test whether  
822 there are different brain structure-behavior relationships for the DTcost of serial subtraction speed  
823 compared to the DTcost of gait metrics.

### 824 **3.6 Conclusions**

825 In this multimodal neuroimaging study, we found widespread age-related atrophy across cortical,  
826 subcortical, and cerebellar regions, but particularly in regions related to sensorimotor processing  
827 (e.g., the pre- and postcentral gyri). We then identified potential compensatory relationships  
828 between better maintenance of brain structure in regions not classically associated with motor  
829 control (e.g., the temporal cortices) and preserved dual task walking abilities in older adults. This  
830 suggests a role for the temporal cortices in maintaining behavioral function in aging, particularly  
831 when other brain regions responsible for locomotor control (e.g., the sensorimotor cortex, basal  
832 ganglia, and cerebellum) may be largely atrophied. Additionally, we identified one relationship  
833 between less specific subcortical atrophy (i.e., larger lateral ventricles) and greater slowing  
834 during dual task walking in aging. As the global population quickly ages, and emerging evidence  
835 continues to relate mobility problems with pathologies such as cognitive decline (Dodge et al.,  
836 2012; Knapstad et al., 2019), it is becoming increasingly critical to understand the structural  
837 neural correlates of locomotor function in aging. Identifying such brain markers could help identify  
838 those at the greatest risk of mobility declines, as well as identify targets for future interventions to  
839 preserve mobility and prevent disability among older adults.

## **CONFLICT OF INTEREST STATEMENT**

840 The authors declare that the research was conducted in the absence of any commercial or  
841 financial relationships that could be construed as a potential conflict of interest.

## **AUTHOR CONTRIBUTIONS**

842 KH led the initial study design, collected and preprocessed all of the neuroimaging and gait data,  
843 conducted all statistical analyses, created the figures and tables, and wrote the first draft of  
844 the manuscript. JG assisted with data collection, data processing, and manuscript preparation.  
845 OP and HR consulted on DWI preprocessing and contributed to manuscript preparation. CH  
846 consulted on the design and analysis of the gait assessments. RS oversaw project design and  
847 led the interpretation and discussion of the results. All authors participated in revision of the  
848 manuscript.

## **FUNDING**

849 During completion of this work, KH was supported by a National Science Foundation Graduate  
850 Research Fellowship under Grant no. DGE-1315138 and DGE-1842473, National Institute of  
851 Neurological Disorders and Stroke training grant T32-NS082128, and National Institute on Aging  
852 fellowship 1F99AG068440. HM was supported by a Natural Sciences and Engineering Research  
853 Council of Canada postdoctoral fellowship and a NASA Human Research Program augmentation  
854 grant. RS was supported by a grant from the National Institute on Aging U01AG061389. A portion  
855 of this work was performed in the McKnight Brain Institute at the National High Magnetic Field  
856 Laboratory's Advanced Magnetic Resonance Imaging and Spectroscopy (AMRIS) Facility, which  
857 is supported by National Science Foundation Cooperative Agreement No. DMR-1644779 and the  
858 State of Florida.

## **ACKNOWLEDGMENTS**

859 The authors wish to thank Aakash Anandjiwala, Pilar Alvarez Jerez, and Alexis Jennings-Coulibaly  
860 for their assistance in subject recruitment and data collection, as well as Sutton Richmond for his  
861 help in applying the signal drift correction to the diffusion-weighted data. The authors also wish to  
862 thank all of the participants who volunteered their time, as well as the McKnight Brain Institute  
863 MRI technologists, without whom this project would not have been possible.

## **DATA AVAILABILITY STATEMENT**

864 The raw data supporting the conclusions of this article will be made available by the authors,  
865 without undue reservation.

## REFERENCES

- 866 Al-Yahya, E., Dawes, H., Smith, L., Dennis, A., Howells, K., and Cockburn, J. (2011). Cognitive  
867 motor interference while walking: a systematic review and meta-analysis. *Neurosci. Biobehav.*  
868 *Rev.* 35, 715–728. doi:10.1016/j.neubiorev.2010.08.008
- 869 Albi, A., Pasternak, O., Minati, L., Marizzoni, M., Bartrés-Faz, D., Bargallo, N., et al. (2017). Free  
870 water elimination improves test–retest reproducibility of diffusion tensor imaging indices in the  
871 brain: A longitudinal multisite study of healthy elderly subjects. *Hum. Brain Mapp.* 38, 12–26.  
872 doi:10.1002/hbm.23350
- 873 Allali, G., Montembeault, M., Brambati, S. M., Bherer, L., Blumen, H. M., Launay, C. P., et al.  
874 (2019). Brain structure covariance associated with gait control in aging. *J. Gerontol. A Biol.*  
875 *Sci. Med. Sci.* 74, 705–713. doi:10.1093/gerona/gly123
- 876 Allali, G., Van Der Meulen, M., Beauchet, O., Rieger, S. W., Vuilleumier, P., and Assal, F. (2014).  
877 The neural basis of age-related changes in motor imagery of gait: an fMRI study. *J. Gerontol.*  
878 *A Biol. Sci. Med. Sci.* 69, 1389–1398. doi:10.1093/gerona/glt207
- 879 Amemiya, K. and Naito, E. (2016). Importance of human right inferior frontoparietal network  
880 connected by inferior branch of superior longitudinal fasciculus tract in corporeal awareness of  
881 kinesthetic illusory movement. *Cortex* 78, 15–30. doi:10.1016/j.cortex.2016.01.017
- 882 Andersson, J. L., Jenkinson, M., Smith, S., and Andersson, J. (2007a). Non-linear optimisation.  
883 FMRIB technical report tr07ja1. *FMRIB Analysis Group of the University of Oxford*
- 884 Andersson, J. L., Jenkinson, M., Smith, S., et al. (2007b). Non-linear registration, aka spatial  
885 normalisation FMRIB technical report tr07ja2. *FMRIB Analysis Group of the University of*  
886 *Oxford*
- 887 Andersson, J. L., Skare, S., and Ashburner, J. (2003). How to correct susceptibility distortions  
888 in spin-echo echo-planar images: application to diffusion tensor imaging. *NeuroImage* 20,  
889 870–888. doi:10.1016/S1053-8119(03)00336-7
- 890 Andersson, J. L. and Sotiropoulos, S. N. (2016). An integrated approach to correction for  
891 off-resonance effects and subject movement in diffusion MR imaging. *NeuroImage* 125,  
892 1063–1078. doi:10.1016/j.neuroimage.2015.10.019
- 893 Annweiler, C., Montero-Odasso, M., Bartha, R., Drozd, J., Hachinski, V., and Beauchet, O. (2014).  
894 Association between gait variability and brain ventricle attributes: a brain mapping study. *Exp.*  
895 *Gerontol.* 57, 256–263. doi:10.1016/j.exger.2014.06.015
- 896 Ashburner, J., Barnes, G., Chen, C.-C., Daunizeau, J., Flandin, G., Friston, K., et al. (2014).  
897 SPM12 manual. *Wellcome Trust Centre for Neuroimaging, London, UK* 2464
- 898 Avants, B. B., Tustison, N. J., Song, G., Cook, P. A., Klein, A., and Gee, J. C. (2011). A  
899 reproducible evaluation of ANTs similarity metric performance in brain image registration.  
900 *NeuroImage* 54, 2033–2044. doi:10.1016/j.neuroimage.2010.09.025
- 901 Avants, B. B., Yushkevich, P., Pluta, J., Minkoff, D., Korczykowski, M., Detre, J., et al. (2010).  
902 The optimal template effect in hippocampus studies of diseased populations. *NeuroImage* 49,  
903 2457–2466. doi:10.1016/j.neuroimage.2009.09.062
- 904 Ayers, E. I., Tow, A. C., Holtzer, R., and Verghese, J. (2014). Walking while talking and falls in  
905 aging. *Gerontology* 60, 108–113. doi:10.1159/000355119
- 906 Bayot, M., Dujardin, K., Dissaux, L., Tard, C., Defebvre, L., Bonnet, C. T., et al. (2020).  
907 Can dual-task paradigms predict falls better than single task?—a systematic literature review.  
908 *Neurophysiol. Clin.* doi:10.1016/j.neucli.2020.10.008

- 909 Beauchet, O., Allali, G., Annweiler, C., Bridenbaugh, S., Assal, F., Kressig, R. W., et al. (2009).  
910 Gait variability among healthy adults: low and high stride-to-stride variability are both a reflection  
911 of gait stability. *Gerontology* 55, 702–706. doi:10.1159/000235905
- 912 Beauchet, O., Launay, C. P., Annweiler, C., and Allali, G. (2015). Hippocampal volume, early  
913 cognitive decline and gait variability: which association? *Exp. Gerontol.* 61, 98–104. doi:10.  
914 1016/j.exger.2014.11.002
- 915 Beauchet, O., Launay, C. P., Sekhon, H., Montembeault, M., and Allali, G. (2019). Association of  
916 hippocampal volume with gait variability in pre-dementia and dementia stages of alzheimer  
917 disease: results from a cross-sectional study. *Exp. Gerontol.* 115, 55–61. doi:10.1016/j.exger.  
918 2018.11.010
- 919 Benjamini, Y. and Hochberg, Y. (1995). Controlling the false discovery rate: a practical and  
920 powerful approach to multiple testing. *J. R. Stat. Soc. Series B Stat. Methodol.* 57, 289–300.  
921 doi:10.1111/j.2517-6161.1995.tb02031.x
- 922 Bennett, I. J., Madden, D. J., Vaidya, C. J., Howard, D. V., and Howard, J. H. (2010). Age-related  
923 differences in multiple measures of white matter integrity: A diffusion tensor imaging study of  
924 healthy aging. *Hum. Brain Mapp.* 31. doi:10.1002/hbm.20872
- 925 Bernard, J. A., Leopold, D. R., Calhoun, V. D., and Mittal, V. A. (2015). Regional cerebellar  
926 volume and cognitive function from adolescence to late middle age. *Hum. Brain Mapp.* 36,  
927 1102–1120. doi:10.1002/hbm.22690
- 928 Beurskens, R. and Bock, O. (2012). Age-related deficits of dual-task walking: a review. *Neural*  
929 *Plast.* 2012. doi:10.1155/2012/131608
- 930 Beurskens, R., Helmich, I., Rein, R., and Bock, O. (2014). Age-related changes in prefrontal  
931 activity during walking in dual-task situations: a fNIRS study. *Int. J. Psychophysiol.* 92, 122–128.  
932 doi:10.1016/j.ijpsycho.2014.03.005
- 933 Bridenbaugh, S. A. and Kressig, R. W. (2015). Motor cognitive dual tasking: early detection of  
934 gait impairment, fall risk and cognitive decline. *Zeitschrift für Gerontologie und Geriatrie* 48,  
935 15–21. doi:10.1007/s00391-014-0845-0
- 936 Buijn, S. M., Van Impe, A., Duysens, J., and Swinnen, S. P. (2014). White matter microstructural  
937 organization and gait stability in older adults. *Front. Aging Neurosci.* 6, 104. doi:10.3389/fnagi.  
938 2014.00104
- 939 Cabeza, R., Anderson, N. D., Locantore, J. K., and McIntosh, A. R. (2002). Aging gracefully:  
940 compensatory brain activity in high-performing older adults. *NeuroImage* 17, 1394–1402.  
941 doi:10.1006/nimg.2002.1280
- 942 Callisaya, M. L., Beare, R., Phan, T. G., Blizzard, L., Thrift, A. G., Chen, J., et al. (2013). Brain  
943 structural change and gait decline: a longitudinal population-based study. *J. Am. Geriatr. Soc.*  
944 61, 1074–1079. doi:10.1111/jgs.12331
- 945 Callisaya, M. L., Blizzard, L., Schmidt, M. D., Martin, K. L., McGinley, J. L., Sanders, L. M.,  
946 et al. (2011). Gait, gait variability and the risk of multiple incident falls in older people: a  
947 population-based study. *Age Ageing* 40, 481–487. doi:10.1093/ageing/afr055
- 948 Camicioli, R., Moore, M., Sexton, G., Howieson, D., and Kaye, J. A. (1999). Age-related brain  
949 changes associated with motor function in healthy older people. *J. Am. Geriatr. Soc.* 47,  
950 330–334. doi:10.1111/j.1532-5415.1999.tb02997.x
- 951 Cao, B., Mwangi, B., Passos, I. C., Wu, M.-J., Keser, Z., Zunta-Soares, G. B., et al. (2017).  
952 Lifespan gyrification trajectories of human brain in healthy individuals and patients with major  
953 psychiatric disorders. *Sci. Rep.* 7, 1–8. doi:10.1038/s41598-017-00582-1

- 954 Carmichael, O. T., Lopez, O., Becker, J. T., and Kuller, L. (2009). Trajectories of brain loss in  
955 aging and the development of cognitive impairment. *Neurology* 72, 771–772. doi:10.1212/01.  
956 wnl.0000339386.26096.93
- 957 Carson, N., Leach, L., and Murphy, K. J. (2018). A re-examination of montreal cognitive  
958 assessment (MoCA) cutoff scores. *Int. J. Geriatr. Psychiatry* 33, 379–388. doi:10.1002/gps.4756
- 959 Chad, J. A., Pasternak, O., Salat, D. H., and Chen, J. J. (2018). Re-examining age-related  
960 differences in white matter microstructure with free-water corrected diffusion tensor imaging.  
961 *Neurobiol. Aging* 71, 161–170. doi:10.1016/j.neurobiolaging.2018.07.018
- 962 Cox, S. R., Ritchie, S. J., Tucker-Drob, E. M., Liewald, D. C., Hagenaars, S. P., Davies, G.,  
963 et al. (2016). Ageing and brain white matter structure in 3,513 UK biobank participants. *Nat.*  
964 *Commun.* 7, 1–13. doi:10.1038/ncomms13629
- 965 Dahnke, R., Yotter, R. A., and Gaser, C. (2013). Cortical thickness and central surface estimation.  
966 *NeuroImage* 65, 336–348. doi:10.1016/j.neuroimage.2012.09.050
- 967 de Groot, M., Cremers, L. G., Ikram, M. A., Hofman, A., Krestin, G. P., van der Lugt, A., et al.  
968 (2016). White matter degeneration with aging: longitudinal diffusion MR imaging analysis.  
969 *Radiology* 279, 532–541. doi:10.1148/radiol.2015150103
- 970 de Jager, C. A., Budge, M. M., and Clarke, R. (2003). Utility of TICS-M for the assessment of  
971 cognitive function in older adults. *Int. J. Geriatr. Psychiatry* 18, 318–324. doi:10.1002/gps.830
- 972 Demnitz, N., Zsoldos, E., Mahmood, A., Mackay, C. E., Kivimäki, M., Singh-Manoux, A., et al.  
973 (2017). Associations between mobility, cognition, and brain structure in healthy older adults.  
974 *Front. Aging Neurosci.* 9, 155. doi:10.3389/fnagi.2017.00155
- 975 Desai, R., Liebenthal, E., Possing, E. T., Waldron, E., and Binder, J. R. (2005). Volumetric  
976 vs. surface-based alignment for localization of auditory cortex activation. *NeuroImage* 26,  
977 1019–1029. doi:10.1016/j.neuroimage.2005.03.024
- 978 Desikan, R. S., Ségonne, F., Fischl, B., Quinn, B. T., Dickerson, B. C., Blacker, D., et al. (2006).  
979 An automated labeling system for subdividing the human cerebral cortex on MRI scans into  
980 gyral based regions of interest. *NeuroImage* 31, 968–980. doi:10.1016/j.neuroimage.2006.01.021
- 981 Diedrichsen, J. (2006). A spatially unbiased atlas template of the human cerebellum. *NeuroImage*  
982 33, 127–138. doi:10.1016/j.neuroimage.2006.05.056
- 983 Diedrichsen, J., Balsters, J. H., Flavell, J., Cussans, E., and Ramnani, N. (2009). A probabilistic  
984 MR atlas of the human cerebellum. *NeuroImage* 46, 39–46. doi:10.1016/j.neuroimage.2009.01.  
985 045
- 986 Dodge, H., Mattek, N., Austin, D., Hayes, T., and Kaye, J. (2012). In-home walking speeds and  
987 variability trajectories associated with mild cognitive impairment. *Neurology* 78, 1946–1952.  
988 doi:10.1212/WNL.0b013e318259e1de
- 989 Doi, T., Makizako, H., Shimada, H., Park, H., Tsutsumimoto, K., Uemura, K., et al. (2013). Brain  
990 activation during dual-task walking and executive function among older adults with mild cognitive  
991 impairment: a fNIRS study. *Aging Clin. Exp. Res.* 25, 539–544. doi:10.1007/s40520-013-0119-5
- 992 Downar, J., Crawley, A. P., Mikulis, D. J., and Davis, K. D. (2000). A multimodal cortical  
993 network for the detection of changes in the sensory environment. *Nat. Neurosci.* 3, 277–283.  
994 doi:10.1038/72991
- 995 Dumurgier, J., Crivello, F., Mazoyer, B., Ahmed, I., Tavernier, B., Grabli, D., et al. (2012). MRI  
996 atrophy of the caudate nucleus and slower walking speed in the elderly. *NeuroImage* 60,  
997 871–878. doi:10.1016/j.neuroimage.2012.01.102

- 998 Elias, L. J., Bryden, M. P., and Bulman-Fleming, M. B. (1998). Footedness is a better predictor  
999 than is handedness of emotional lateralization. *Neuropsychologia* 36, 37–43. doi:10.1016/  
1000 S0028-3932(97)00107-3
- 1001 Espy, D. D., Yang, F., Bhatt, T., and Pai, Y.-C. (2010). Independent influence of gait speed and  
1002 step length on stability and fall risk. *Gait Posture* 32, 378–382. doi:10.1016/j.gaitpost.2010.06.013
- 1003 Fettrow, T., Hupfeld, K., Reimann, H., Choi, J., Hass, C., and Seidler, R. (2021a). Age differences  
1004 in adaptation of medial-lateral gait parameters during split-belt treadmill walking. *Research*  
1005 *Square* doi:10.21203/rs.3.rs-777512/v1
- 1006 Fettrow, T., Hupfeld, K., Tays, G., Clark, D. J., Reuter-Lorenz, P. A., and Seidler, R. D. (2021b).  
1007 Brain activity during walking in older adults: Implications for compensatory versus dysfunctional  
1008 accounts. *Neurobiol. Aging* 105, 349–364. doi:10.1016/j.neurobiolaging.2021.05.015
- 1009 Field, A., Miles, J., and Field, Z. (2012). *Discovering Statistics Using R* (Sage Publications)
- 1010 Fjell, A. M., Walhovd, K. B., Fennema-Notestine, C., McEvoy, L. K., Hagler, D. J., Holland, D.,  
1011 et al. (2009a). One-year brain atrophy evident in healthy aging. *J. Neurosci.* 29, 15223–15231.  
1012 doi:10.1523/JNEUROSCI.3252-09.2009
- 1013 Fjell, A. M., Westlye, L. T., Amlie, I., Espeseth, T., Reinvang, I., Raz, N., et al. (2009b). High  
1014 consistency of regional cortical thinning in aging across multiple samples. *Cereb. Cortex* 19,  
1015 2001–2012. doi:10.1093/cercor/bhn232
- 1016 Gaser, C., Dahnke, R., et al. (2016). CAT—a computational anatomy toolbox for the analysis of  
1017 structural MRI data. *Hum. Brain Mapp.* 2016, 336–348
- 1018 Gaser, C. and Kurth, F. (2017). *Manual computational anatomy toolbox-CAT12* (Structural Brain  
1019 Mapping Group at the Departments of Psychiatry and Neurology, University of Jena)
- 1020 Ghanavati, T., Smitt, M. S., Lord, S. R., Sachdev, P., Wen, W., Kochan, N. A., et al. (2018). Deep  
1021 white matter hyperintensities, microstructural integrity and dual task walking in older people.  
1022 *Brain Imaging Behav.* 12, 1488–1496. doi:10.1007/s11682-017-9787-7
- 1023 Gillain, S., Boutayamou, M., Schwartz, C., Bröls, O., Bruyère, O., Croisier, J.-L., et al. (2019).  
1024 Using supervised learning machine algorithm to identify future fallers based on gait patterns: a  
1025 two-year longitudinal study. *Exp. Gerontol.* 127, 110730
- 1026 Godin, G., Shephard, R., et al. (1985). A simple method to assess exercise behavior in the  
1027 community. *Can. J. Appl. Sport Sci.* 10, 141–146
- 1028 Gullett, J. M., O’Shea, A., Lamb, D. G., Porges, E. C., O’Shea, D. M., Pasternak, O., et al. (2020).  
1029 The association of white matter free water with cognition in older adults. *NeuroImage* 219,  
1030 117040. doi:10.1016/j.neuroimage.2020.117040
- 1031 Guttuso, T., Bergsland, N., Hagemeyer, J., Lichter, D. G., Pasternak, O., and Zivadinov, R. (2018).  
1032 Substantia nigra free water increases longitudinally in Parkinson disease. *Am. J. Neuroradiol.*  
1033 39, 479–484. doi:10.3174/ajnr.A5545
- 1034 Halliday, D. W., Hundza, S. R., Garcia-Barrera, M. A., Klimstra, M., Commandeur, D., Lukyn,  
1035 T. V., et al. (2018). Comparing executive function, evoked hemodynamic response, and gait as  
1036 predictors of variations in mobility for older adults. *J. Clin. Exp. Neuropsychol.* 40, 151–160.  
1037 doi:10.1080/13803395.2017.1325453
- 1038 Han, S., An, Y., Carass, A., Prince, J. L., and Resnick, S. M. (2020). Longitudinal analysis of  
1039 regional cerebellum volumes during normal aging. *NeuroImage* 220, 117062. doi:10.1016/j.  
1040 neuroimage.2020.117062
- 1041 Hillel, I., Gazit, E., Nieuwboer, A., Avanzino, L., Rochester, L., Cereatti, A., et al. (2019). Is  
1042 every-day walking in older adults more analogous to dual-task walking or to usual walking?



- 1043 elucidating the gaps between gait performance in the lab and during 24/7 monitoring. *Eur. Rev.*  
1044 *Aging Phys. Act.* 16, 1–12. doi:10.1186/s11556-019-0214-5
- 1045 Hoddes, E., Zarcone, V., and Dement, W. (1972). Stanford sleepiness scale. *Enzyklopädie der*  
1046 *Schlafmedizin* 1184
- 1047 Hogstrom, L. J., Westlye, L. T., Walhovd, K. B., and Fjell, A. M. (2013). The structure of the  
1048 cerebral cortex across adult life: age-related patterns of surface area, thickness, and gyrification.  
1049 *Cereb. Cortex* 23, 2521–2530. doi:10.1093/cercor/bhs231
- 1050 Hollman, J. H., Kovash, F. M., Kubik, J. J., and Linbo, R. A. (2007). Age-related differences in  
1051 spatiotemporal markers of gait stability during dual task walking. *Gait Posture* 26, 113–119.  
1052 doi:10.1016/j.gaitpost.2006.08.005
- 1053 Hollman, J. H., McDade, E. M., and Petersen, R. C. (2011a). Normative spatiotemporal gait  
1054 parameters in older adults. *Gait Posture* 34, 111–118. doi:10.1016/j.gaitpost.2011.03.024
- 1055 Hollman, J. H., Youdas, J. W., and Lanzino, D. J. (2011b). Gender differences in dual task  
1056 gait performance in older adults. *American journal of men's health* 5, 11–17. doi:10.1177/  
1057 1557988309357232
- 1058 Holtzer, R., Mahoney, J. R., Izzetoglu, M., Izzetoglu, K., Onaral, B., and Verghese, J. (2011).  
1059 fNIRS study of walking and walking while talking in young and old individuals. *J. Gerontol. A*  
1060 *Biol. Sci. Med. Sci.* 66, 879–887. doi:10.1093/gerona/glr068
- 1061 Holtzer, R., Mahoney, J. R., Izzetoglu, M., Wang, C., England, S., and Verghese, J. (2015). Online  
1062 fronto-cortical control of simple and attention-demanding locomotion in humans. *NeuroImage*  
1063 112, 152–159. doi:10.1016/j.neuroimage.2015.03.002
- 1064 Howard, M. W., Fotedar, M. S., Datey, A. V., and Hasselmo, M. E. (2005). The temporal context  
1065 model in spatial navigation and relational learning: toward a common explanation of medial  
1066 temporal lobe function across domains. *Psychol. Rev.* 112, 75. doi:10.1037/0033-295X.112.1.75
- 1067 Hua, K., Zhang, J., Wakana, S., Jiang, H., Li, X., Reich, D. S., et al. (2008). Tract probability  
1068 maps in stereotaxic spaces: analyses of white matter anatomy and tract-specific quantification.  
1069 *NeuroImage* 39, 336–347. doi:10.1016/j.neuroimage.2007.07.053
- 1070 Hupfeld, K., McGregor, H., Koppelmans, V., Beltran, N., Kofman, I., De Dios, Y., et al. (2021a).  
1071 Brain and behavioral evidence for reweighting of vestibular inputs with long-duration spaceflight.  
1072 *Cereb. Cortex* , bhab239doi:10.1093/cercor/bhab239
- 1073 Hupfeld, K. E., Hyatt, H. W., Alvarez Jerez, P., Mikkelsen, M., Hass, C. J., Edden, R. A., et al.  
1074 (2021b). *In vivo* brain glutathione is higher in older age and correlates with mobility. *Cereb.*  
1075 *Cortex* 31, 4576–4594. doi:10.1093/cercor/bhab107
- 1076 Hutton, C., Draganski, B., Ashburner, J., and Weiskopf, N. (2009). A comparison between  
1077 voxel-based cortical thickness and voxel-based morphometry in normal aging. *NeuroImage* 48,  
1078 371–380. doi:10.1016/j.neuroimage.2009.06.043
- 1079 Ishai, A., Ungerleider, L. G., Martin, A., Schouten, J. L., and Haxby, J. V. (1999). Distributed  
1080 representation of objects in the human ventral visual pathway. *Proc. Natl. Acad. Sci.* 96,  
1081 9379–9384. doi:10.1073/pnas.96.16.9379
- 1082 Jang, S. H. and Seo, J. P. (2015). Aging of corticospinal tract fibers according to the cerebral  
1083 origin in the human brain: a diffusion tensor imaging study. *Neurosci. Lett.* 585, 77–81.  
1084 doi:10.1016/j.neulet.2014.11.030
- 1085 Jenkinson, M., Beckmann, C. F., Behrens, T. E., Woolrich, M. W., and Smith, S. M. (2012). FSL.  
1086 *NeuroImage* 62, 782–790

- 1087 Jin, K., Zhang, T., Shaw, M., Sachdev, P., and Cherbuin, N. (2018). Relationship between sulcal  
1088 characteristics and brain aging. *Front. Aging Neurosci.* 10, 339. doi:10.3389/fnagi.2018.00339
- 1089 Johansson, J., Nordström, A., and Nordström, P. (2016). Greater fall risk in elderly women than  
1090 in men is associated with increased gait variability during multitasking. *Journal of the American*  
1091 *Medical Directors Association* 17, 535–540. doi:10.1016/j.jamda.2016.02.009
- 1092 Kelly, V. E., Janke, A. A., and Shumway-Cook, A. (2010). Effects of instructed focus and task  
1093 difficulty on concurrent walking and cognitive task performance in healthy young adults. *Exp.*  
1094 *Brain Res.* 207, 65–73. doi:10.1007/s00221-010-2429-6
- 1095 Knapstad, M. K., Steihaug, O. M., Aaslund, M. K., Nakling, A., Naterstad, I. F., Fladby, T., et al.  
1096 (2019). Reduced walking speed in subjective and mild cognitive impairment: a cross-sectional  
1097 study. *J. Geriatr. Phys. Ther.* 42, E122–E128. doi:10.1519/JPT.000000000000157
- 1098 Koenraadt, K. L., Roelofsen, E. G., Duysens, J., and Keijsers, N. L. (2014). Cortical control of  
1099 normal gait and precision stepping: an fNIRS study. *NeuroImage* 85, 415–422. doi:10.1016/j.  
1100 neuroimage.2013.04.070
- 1101 Koppelmans, V., Hoogendam, Y. Y., Hirsiger, S., Mérillat, S., Jäncke, L., and Seidler, R. D. (2017).  
1102 Regional cerebellar volumetric correlates of manual motor and cognitive function. *Brain Struct.*  
1103 *Funct.* 222, 1929–1944. doi:10.1007/s00429-016-1317-7
- 1104 Kraus, L. (2016). 2015 disability statistics annual report. a publication of the rehabilitation  
1105 research and training center on disability statistics and demographics. *Institute on Disability,*  
1106 *University of New Hampshire*
- 1107 Lamballais, S., Vinke, E. J., Vernooij, M. W., Ikram, M. A., and Muetzel, R. L. (2020). Cortical  
1108 gyrification in relation to age and cognition in older adults. *NeuroImage* 212, 116637. doi:10.  
1109 1016/j.neuroimage.2020.116637
- 1110 Leemans, A., Jeurissen, B., Sijbers, J., and Jones, D. (2009). ExploreDTI: a graphical toolbox for  
1111 processing, analyzing, and visualizing diffusion MR data. *Proc. Int. Soc. Magn. Reson. Med.*  
1112 *Sci.* 17
- 1113 Lemaitre, H., Goldman, A. L., Sambataro, F., Verchinski, B. A., Meyer-Lindenberg, A., Weinberger,  
1114 D. R., et al. (2012). Normal age-related brain morphometric changes: nonuniformity across  
1115 cortical thickness, surface area and gray matter volume? *Neurobiol. Aging* 33, 617–e1.  
1116 doi:10.1016/j.neurobiolaging.2010.07.013
- 1117 Li, C., Verghese, J., and Holtzer, R. (2014). A comparison of two walking while talking paradigms  
1118 in aging. *Gait Posture* 40, 415–419. doi:10.1016/j.gaitpost.2014.05.062
- 1119 Lucas, M., Wagshul, M. E., Izzetoglu, M., and Holtzer, R. (2019). Moderating effect of white  
1120 matter integrity on brain activation during dual-task walking in older adults. *J. Gerontol. A Biol.*  
1121 *Sci. Med. Sci.* 74, 435–441. doi:10.1093/gerona/gly131
- 1122 Luders, E., Thompson, P. M., Narr, K., Toga, A. W., Jancke, L., and Gaser, C. (2006). A  
1123 curvature-based approach to estimate local gyrification on the cortical surface. *NeuroImage*  
1124 29, 1224–1230. doi:10.1016/j.neuroimage.2005.08.049
- 1125 Lundin-Olsson, L., Nyberg, L., Gustafson, Y., et al. (1997). Stops walking when talking as a  
1126 predictor of falls in elderly people. *Lancet* 349, 617
- 1127 MacAulay, R. K., Brouillette, R. M., Foil, H. C., Bruce-Keller, A. J., and Keller, J. N. (2014). A  
1128 longitudinal study on dual-tasking effects on gait: cognitive change predicts gait variance in the  
1129 elderly. *PloS one* 9, e99436. doi:10.1371/journal.pone.0099436
- 1130 Madan, C. R. (2021). Age-related decrements in cortical gyrification: Evidence from an  
1131 accelerated longitudinal dataset. *European J. Neurosci.* 53, 1661–1671. doi:10.1111/ejn.15039

- 1132 Madan, C. R. and Kensinger, E. A. (2016). Cortical complexity as a measure of age-related brain  
1133 atrophy. *NeuroImage* 134, 617–629. doi:10.1016/j.neuroimage.2016.04.029
- 1134 Madan, C. R. and Kensinger, E. A. (2018). Predicting age from cortical structure across the  
1135 lifespan. *European J. Neurosci.* 47, 399–416. doi:10.1111/ejn.13835
- 1136 Madden, D. J., Bennett, I. J., Burzynska, A., Potter, G. G., Chen, N.-k., and Song, A. W. (2012).  
1137 Diffusion tensor imaging of cerebral white matter integrity in cognitive aging. *Biochim. Biophys.*  
1138 *Acta Mol. Basis Dis.* 1822, 386–400. doi:10.1016/j.bbadis.2011.08.003
- 1139 Maidan, I., Mirelman, A., Hausdorff, J. M., Stern, Y., and Habeck, C. G. (2021). Distinct cortical  
1140 thickness patterns link disparate cerebral cortex regions to select mobility domains. *Sci. Rep.*  
1141 11, 1–11. doi:10.1038/s41598-021-85058-z
- 1142 Maillard, P., Fletcher, E., Singh, B., Martinez, O., Johnson, D. K., Olichney, J. M., et al. (2019).  
1143 Cerebral white matter free water: A sensitive biomarker of cognition and function. *Neurology*  
1144 92, e2221–e2231. doi:10.1212/WNL.0000000000007449
- 1145 Malcolm, B. R., Foxe, J. J., Butler, J. S., and De Sanctis, P. (2015). The aging brain shows  
1146 less flexible reallocation of cognitive resources during dual-task walking: a mobile brain/body  
1147 imaging (MoBI) study. *NeuroImage* 117, 230–242. doi:10.1016/j.neuroimage.2015.05.028
- 1148 Meier-Ruge, W., Ulrich, J., Brühlmann, M., and Meier, E. (1992). Age-related white matter  
1149 atrophy in the human brain. *Annals of the New York Academy of Sciences* 673, 260–269.  
1150 doi:10.1111/j.1749-6632.1992.tb27462.x
- 1151 Mesulam, M. (1998). From sensation to perception. *Brain* 121, 1013–1052. doi:10.1093/brain/121.  
1152 6.1013
- 1153 Miller, K. L., Alfaro-Almagro, F., Bangerter, N. K., Thomas, D. L., Yacoub, E., Xu, J., et al. (2016).  
1154 Multimodal population brain imaging in the UK Biobank prospective epidemiological study. *Nat.*  
1155 *Neurosci.* 19, 1523–1536. doi:10.1038/nn.4393
- 1156 Mirelman, A., Maidan, I., Bernad-Elazari, H., Shustack, S., Giladi, N., and Hausdorff, J. M. (2017).  
1157 Effects of aging on prefrontal brain activation during challenging walking conditions. *Brain*  
1158 *Cogn.* 115, 41–46. doi:10.1016/j.bandc.2017.04.002
- 1159 Miyai, I., Tanabe, H. C., Sase, I., Eda, H., Oda, I., Konishi, I., et al. (2001). Cortical mapping of  
1160 gait in humans: a near-infrared spectroscopic topography study. *NeuroImage* 14, 1186–1192.  
1161 doi:10.1006/nimg.2001.0905
- 1162 Miyashita, Y. (1993). Inferior temporal cortex: where visual perception meets memory. *Annu. Rev.*  
1163 *Neurosci.* 16, 245–263. doi:10.1146/annurev.ne.16.030193.001333
- 1164 Moe-Nilssen, R., Aaslund, M. K., Hodt-Billington, C., and Helbostad, J. L. (2010). Gait variability  
1165 measures may represent different constructs. *Gait Posture* 32, 98–101. doi:10.1016/j.gaitpost.  
1166 2010.03.019
- 1167 Montero-Odasso, M., Verghese, J., Beauchet, O., and Hausdorff, J. M. (2012). Gait and cognition:  
1168 a complementary approach to understanding brain function and the risk of falling. *J. Am.*  
1169 *Geriatr. Soc.* 60, 2127–2136. doi:10.1111/j.1532-5415.2012.04209.x
- 1170 Montero-Odasso, M. M., Sarquis-Adamson, Y., Speechley, M., Borrie, M. J., Hachinski, V. C.,  
1171 Wells, J., et al. (2017). Association of dual-task gait with incident dementia in mild cognitive  
1172 impairment: results from the gait and brain study. *JAMA Neurol.* 74, 857–865. doi:10.1001/  
1173 jamaneurol.2017.0643.
- 1174 Nasreddine, Z. S., Phillips, N. A., Bédirian, V., Charbonneau, S., Whitehead, V., Collin, I., et al.  
1175 (2005). The montreal cognitive assessment, MoCA: a brief screening tool for mild cognitive  
1176 impairment. *J. Am. Geriatr. Soc.* 53, 695–699. doi:10.1111/j.1532-5415.2005.53221.x

- 1177 Ofori, E., Pasternak, O., Planetta, P. J., Li, H., Burciu, R. G., Snyder, A. F., et al. (2015).  
1178 Longitudinal changes in free-water within the substantia nigra of Parkinson's disease. *Brain*  
1179 138, 2322–2331. doi:10.1093/brain/awv136
- 1180 Oldfield, R. C. (1971). The assessment and analysis of handedness: the Edinburgh inventory.  
1181 *Neuropsychologia* 9, 97–113. doi:10.1016/0028-3932(71)90067-4
- 1182 Papegaaij, S., Taube, W., Baudry, S., Otten, E., and Hortobágyi, T. (2014). Aging causes  
1183 a reorganization of cortical and spinal control of posture. *Front. Aging Neurosci.* 6, 28.  
1184 doi:10.3389/fnagi.2014.00028
- 1185 Pasternak, O., Sochen, N., Gur, Y., Intrator, N., and Assaf, Y. (2009). Free water elimination and  
1186 mapping from diffusion MRI. *Magn. Reson. Imaging* 62, 717–730. doi:10.1002/mrm.22055
- 1187 Patel, P., Lamar, M., and Bhatt, T. (2014). Effect of type of cognitive task and walking speed on  
1188 cognitive-motor interference during dual-task walking. *Neuroscience* 260, 140–148. doi:10.  
1189 1016/j.neuroscience.2013.12.016
- 1190 Petersen, T. H., Willerslev-Olsen, M., Conway, B. A., and Nielsen, J. B. (2012). The motor  
1191 cortex drives the muscles during walking in human subjects. *J Physiol* 590, 2443–2452.  
1192 doi:10.1113/jphysiol.2012.227397
- 1193 Pettersson, A. F., Olsson, E., and Wahlund, L.-O. (2007). Effect of divided attention on gait  
1194 in subjects with and without cognitive impairment. *J Geriatr Psychiatry Neurol* 20, 58–62.  
1195 doi:10.1177/0891988706293528
- 1196 Piccinelli, M. (1998). Alcohol use disorders identification test (AUDIT). *Epidemiol. Psychiatr. Sci.*  
1197 7, 70–73
- 1198 Pierpaoli, C., Barnett, A., Pajevic, S., Chen, R., Penix, L., Virta, A., et al. (2001). Water  
1199 diffusion changes in wallerian degeneration and their dependence on white matter architecture.  
1200 *NeuroImage* 13, 1174–1185. doi:10.1006/nimg.2001.0765
- 1201 Pinheiro, J., Bates, D., DebRoy, S., Sarkar, D., and Team, R. C. (2007). Linear and nonlinear  
1202 mixed effects models. *R* 3, 1–89
- 1203 Powell, L. E. and Myers, A. M. (1995). The activities-specific balance confidence (ABC) scale. *J.*  
1204 *Gerontol. A Biol. Sci. Med. Sci.* 50, M28–M34. doi:10.1093/gerona/50A.1.M28
- 1205 Quach, L., Galica, A. M., Jones, R. N., Procter-Gray, E., Manor, B., Hannan, M. T., et al.  
1206 (2011). The nonlinear relationship between gait speed and falls: the maintenance of balance,  
1207 independent living, intellect, and zest in the elderly of boston study. *J. Am. Geriatr. Soc.* 59,  
1208 1069–1073. doi:10.1111/j.1532-5415.2011.03408.x
- 1209 R Core Team, X. (2013). R: A language and environment for statistical computing
- 1210 Raz, N., Ghisletta, P., Rodrigue, K. M., Kennedy, K. M., and Lindenberger, U. (2010). Trajectories  
1211 of brain aging in middle-aged and older adults: regional and individual differences. *NeuroImage*  
1212 51, 501–511. doi:10.1016/j.neuroimage.2010.03.020
- 1213 Rettmann, M. E., Kraut, M. A., Prince, J. L., and Resnick, S. M. (2006). Cross-sectional and  
1214 longitudinal analyses of anatomical sulcal changes associated with aging. *Cereb. Cortex* 16,  
1215 1584–1594. doi:10.1093/cercor/bhj095
- 1216 Rodríguez-Herreros, B., Amengual, J. L., Gurtubay-Antolín, A., Richter, L., Jauer, P., Erdmann, C.,  
1217 et al. (2015). Microstructure of the superior longitudinal fasciculus predicts stimulation-induced  
1218 interference with on-line motor control. *NeuroImage* 120, 254–265. doi:10.1016/j.neuroimage.  
1219 2015.06.070

- 1220 Romero, J. E., Coupé, P., Giraud, R., Ta, V.-T., Fonov, V., Park, M. T. M., et al. (2017). CERES:  
1221 a new cerebellum lobule segmentation method. *NeuroImage* 147, 916–924. doi:10.1016/j.  
1222 neuroimage.2016.11.003
- 1223 Rosano, C., Aizenstein, H. J., Studenski, S., and Newman, A. B. (2007). A regions-of-interest  
1224 volumetric analysis of mobility limitations in community-dwelling older adults. *J. Gerontol. A*  
1225 *Biol. Sci. Med. Sci.* 62, 1048–1055. doi:10.1093/gerona/62.9.1048
- 1226 Rosenthal, R., Cooper, H., Hedges, L., et al. (1994). Parametric measures of effect size.  
1227 *Handbook Res. Synth.* 621, 231–244
- 1228 Ross, D., Wagshul, M. E., Izzetoglu, M., and Holtzer, R. (2021). Prefrontal cortex activation  
1229 during dual-task walking in older adults is moderated by thickness of several cortical regions.  
1230 *GeroScience* , 1–16doi:10.1007/s11357-021-00379-1
- 1231 Salat, D. H., Buckner, R. L., Snyder, A. Z., Greve, D. N., Desikan, R. S., Busa, E., et al. (2004).  
1232 Thinning of the cerebral cortex in aging. *Cereb. Cortex.* 14, 721–730. doi:10.1093/cercor/bhh032
- 1233 Salazar, A. P., Hupfeld, K. E., Lee, J. K., Banker, L. A., Tays, G. D., Beltran, N. E., et al. (2021).  
1234 Visuomotor adaptation brain changes during a spaceflight analog with elevated carbon dioxide  
1235 (co<sub>2</sub>): A pilot study. *Front. in Neural Circuits* 15, 51. doi:10.3389/fncir.2021.659557
- 1236 Salazar, A. P., Hupfeld, K. E., Lee, J. K., Beltran, N. E., Kofman, I. S., De Dios, Y. E., et al. (2020).  
1237 Neural working memory changes during a spaceflight analog with elevated carbon dioxide: a  
1238 pilot study. *Frontiers in Systems Neuroscience* 14, 48. doi:10.3389/fnsys.2020.00048
- 1239 Sexton, C. E., Walhovd, K. B., Storsve, A. B., Tamnes, C. K., Westlye, L. T., Johansen-Berg, H.,  
1240 et al. (2014). Accelerated changes in white matter microstructure during aging: a longitudinal  
1241 diffusion tensor imaging study. *J. Neurosci.* 34, 15425–15436. doi:10.1523/JNEUROSCI.0203-14.  
1242 2014
- 1243 Shinoura, N., Suzuki, Y., Yamada, R., Tabei, Y., Saito, K., and Yagi, K. (2009). Damage to the  
1244 right superior longitudinal fasciculus in the inferior parietal lobe plays a role in spatial neglect.  
1245 *Neuropsychologia* 47, 2600–2603. doi:10.1016/j.neuropsychologia.2009.05.010
- 1246 Smith, E., Cusack, T., and Blake, C. (2016). The effect of a dual task on gait speed in community  
1247 dwelling older adults: a systematic review and meta-analysis. *Gait Posture* 44, 250–258.  
1248 doi:10.1016/j.gaitpost.2015.12.017
- 1249 Smith, S. M., Jenkinson, M., Johansen-Berg, H., Rueckert, D., Nichols, T. E., Mackay, C. E.,  
1250 et al. (2006). Tract-based spatial statistics: voxelwise analysis of multi-subject diffusion data.  
1251 *NeuroImage* 31, 1487–1505. doi:10.1016/j.neuroimage.2006.02.024
- 1252 Smith, S. M., Jenkinson, M., Woolrich, M. W., Beckmann, C. F., Behrens, T. E., Johansen-Berg,  
1253 H., et al. (2004). Advances in functional and structural MR image analysis and implementation  
1254 as FSL. *NeuroImage* 23, S208–S219. doi:10.1016/j.neuroimage.2004.07.051
- 1255 Song, S.-K., Sun, S.-W., Ju, W.-K., Lin, S.-J., Cross, A. H., and Neufeld, A. H. (2003). Diffusion  
1256 tensor imaging detects and differentiates axon and myelin degeneration in mouse optic nerve  
1257 after retinal ischemia. *NeuroImage* 20, 1714–1722. doi:10.1016/j.neuroimage.2003.07.005
- 1258 Song, S.-K., Sun, S.-W., Ramsbottom, M. J., Chang, C., Russell, J., and Cross, A. H. (2002).  
1259 Dysmyelination revealed through MRI as increased radial (but unchanged axial) diffusion of  
1260 water. *NeuroImage* 17, 1429–1436. doi:10.1006/nimg.2002.1267
- 1261 Song, S.-K., Yoshino, J., Le, T. Q., Lin, S.-J., Sun, S.-W., Cross, A. H., et al. (2005). Demyelination  
1262 increases radial diffusivity in corpus callosum of mouse brain. *NeuroImage* 26, 132–140.  
1263 doi:10.1016/j.neuroimage.2005.01.028

- 1264 Spena, G., Gatignol, P., Capelle, L., and Duffau, H. (2006). Superior longitudinal fasciculus  
1265 subserves vestibular network in humans. *NeuroReport* 17, 1403–1406. doi:10.1097/01.wnr.  
1266 0000223385.49919.61
- 1267 Springer, S., Giladi, N., Peretz, C., Yogev, G., Simon, E. S., and Hausdorff, J. M. (2006). Dual-  
1268 tasking effects on gait variability: The role of aging, falls, and executive function. *Mov. Disord.*  
1269 21, 950–957. doi:10.1002/mds.20848
- 1270 Steffener, J. and Stern, Y. (2012). Exploring the neural basis of cognitive reserve in aging.  
1271 *Biochim. Biophys. Acta Mol. Basis Dis.* 1822, 467–473. doi:10.1016/j.bbadis.2011.09.012
- 1272 Storsve, A. B., Fjell, A. M., Tamnes, C. K., Westlye, L. T., Overbye, K., Aasland, H. W., et al. (2014).  
1273 Differential longitudinal changes in cortical thickness, surface area and volume across the  
1274 adult life span: regions of accelerating and decelerating change. *J. Neurosci.* 34, 8488–8498.  
1275 doi:10.1523/JNEUROSCI.0391-14.2014
- 1276 Takakusaki, K. (2017). Functional neuroanatomy for posture and gait control. *J. Mov. Disord.* 10,  
1277 1. doi:10.14802/jmd.16062
- 1278 Taubert, M., Roggenhofer, E., Melie-Garcia, L., Muller, S., Lehmann, N., Preisig, M., et al.  
1279 (2020). Converging patterns of aging-associated brain volume loss and tissue microstructure  
1280 differences. *Neurobiol. Aging* 88, 108–118. doi:10.1016/j.neurobiolaging.2020.01.006
- 1281 Thambisetty, M., Wan, J., Carass, A., An, Y., Prince, J. L., and Resnick, S. M. (2010). Longitudinal  
1282 changes in cortical thickness associated with normal aging. *NeuroImage* 52, 1215–1223.  
1283 doi:10.1016/j.neuroimage.2010.04.258
- 1284 Tian, Q., Chastan, N., Bair, W.-N., Resnick, S. M., Ferrucci, L., and Studenski, S. A. (2017). The  
1285 brain map of gait variability in aging, cognitive impairment and dementia—a systematic review.  
1286 *Neurosci. Biobehav. Rev.* 74, 149–162. doi:10.1016/j.neubiorev.2017.01.020
- 1287 Tian, Q., Ferrucci, L., Resnick, S. M., Simonsick, E. M., Shardell, M. D., Landman, B. A., et al.  
1288 (2016). The effect of age and microstructural white matter integrity on lap time variation and  
1289 fast-paced walking speed. *Brain Imaging Behav.* 10, 697–706. doi:10.1007/s11682-015-9449-6
- 1290 Tinetti, M. E., Richman, D., and Powell, L. (1990). Falls efficacy as a measure of fear of falling. *J.*  
1291 *Gerontol.* 45, P239–P243. doi:10.1093/geronj/45.6.P239
- 1292 Tripathi, S., Verghese, J., and Blumen, H. M. (2019). Gray matter volume covariance networks  
1293 associated with dual-task cost during walking-while-talking. *Hum. Brain Mapp.* 40, 2229–2240.  
1294 doi:10.1002/hbm.24520
- 1295 Tuch, D. S., Reese, T. G., Wiegell, M. R., and Wedeen, V. J. (2003). Diffusion MRI of complex  
1296 neural architecture. *Neuron* 40, 885–895. doi:10.1016/S0896-6273(03)00758-X
- 1297 Tullo, S., Devenyi, G. A., Patel, R., Park, M. T. M., Collins, D. L., and Chakravarty, M. M. (2018).  
1298 Warping an atlas derived from serial histology to 5 high-resolution MRIs. *Sci. Data* 5, 1–10.  
1299 doi:10.1038/sdata.2018.107
- 1300 Van Impe, A., Coxon, J. P., Goble, D. J., Wenderoth, N., and Swinnen, S. P. (2011). Age-related  
1301 changes in brain activation underlying single-and dual-task performance: visuomanual drawing  
1302 and mental arithmetic. *Neuropsychologia* 49, 2400–2409. doi:10.1016/j.neuropsychologia.2011.  
1303 04.016
- 1304 van Velsen, E. F., Vernooij, M. W., Vrooman, H. A., van der Lugt, A., Breteler, M. M., Hofman, A.,  
1305 et al. (2013). Brain cortical thickness in the general elderly population: the Rotterdam Scan  
1306 Study. *Neurosci. Lett.* 550, 189–194. doi:10.1016/j.neulet.2013.06.063
- 1307 Venables, W. N., Ripley, B. D., et al. (1999). Modern applied statistics with s-plus

- 1308 Vergheze, J., Holtzer, R., Lipton, R. B., and Wang, C. (2012). Mobility stress test approach to  
1309 predicting frailty, disability, and mortality in high-functioning older adults. *J. Am. Geriatr. Soc.*  
1310 60, 1901–1905. doi:10.1111/j.1532-5415.2012.04145.x
- 1311 Vergheze, J., Kuslansky, G., Holtzer, R., Katz, M., Xue, X., Buschke, H., et al. (2007). Walking  
1312 while talking: effect of task prioritization in the elderly. *Arch. Phys. Med. Rehabil.* 88, 50–53.  
1313 doi:10.1016/j.apmr.2006.10.007
- 1314 Vergheze, J., Wang, C., Ayers, E., Izzetoglu, M., and Holtzer, R. (2017). Brain activation in  
1315 high-functioning older adults and falls: prospective cohort study. *Neurology* 88, 191–197.  
1316 doi:10.1212/WNL.0000000000003421
- 1317 Verhaeghen, P., Steitz, D. W., Sliwinski, M. J., and Cerella, J. (2003). Aging and dual-task  
1318 performance: a meta-analysis. *Psychol. Aging* 18, 443. doi:10.1037/0882-7974.18.3.443
- 1319 Verlinden, V. J., De Groot, M., Cremers, L. G., van der Geest, J. N., Hofman, A., Niessen, W. J.,  
1320 et al. (2016). Tract-specific white matter microstructure and gait in humans. *Neurobiol. Aging*  
1321 43, 164–173. doi:10.1016/j.neurobiolaging.2016.04.005
- 1322 Vos, S. B., Tax, C. M., Luijten, P. R., Ourselin, S., Leemans, A., and Froeling, M. (2017). The  
1323 importance of correcting for signal drift in diffusion MRI. *Magn. Reson. Imaging* 77, 285–299.  
1324 doi:10.1002/mrm.26124
- 1325 Wagshul, M. E., Lucas, M., Ye, K., Izzetoglu, M., and Holtzer, R. (2019). Multi-modal neuroimaging  
1326 of dual-task walking: Structural MRI and fNIRS analysis reveals prefrontal grey matter volume  
1327 moderation of brain activation in older adults. *NeuroImage* 189, 745–754. doi:10.1016/j.  
1328 neuroimage.2019.01.045
- 1329 Wakana, S., Caprihan, A., Panzenboeck, M. M., Fallon, J. H., Perry, M., Gollub, R. L., et al.  
1330 (2007). Reproducibility of quantitative tractography methods applied to cerebral white matter.  
1331 *NeuroImage* 36, 630–644. doi:10.1016/j.neuroimage.2007.02.049
- 1332 Washabaugh, E. P., Kalyanaraman, T., Adamczyk, P. G., Claflin, E. S., and Krishnan, C. (2017).  
1333 Validity and repeatability of inertial measurement units for measuring gait parameters. *Gait*  
1334 *Posture* 55, 87–93. doi:10.1016/j.gaitpost.2017.04.013
- 1335 Wilson, J., Allcock, L., Mc Ardle, R., Taylor, J.-P., and Rochester, L. (2019). The neural correlates  
1336 of discrete gait characteristics in ageing: a structured review. *Neurosci. Biobehav. Rev.* 100,  
1337 344–369. doi:10.1016/j.neubiorev.2018.12.017
- 1338 Winkler, A. M., Kochunov, P., Blangero, J., Almasy, L., Zilles, K., Fox, P. T., et al. (2010). Cortical  
1339 thickness or grey matter volume? the importance of selecting the phenotype for imaging  
1340 genetics studies. *NeuroImage* 53, 1135–1146. doi:10.1016/j.neuroimage.2009.12.028
- 1341 Yang, J., Archer, D. B., Burciu, R. G., Müller, M. L., Roy, A., Ofori, E., et al. (2019). Multimodal  
1342 dopaminergic and free-water imaging in Parkinson’s disease. *Parkinsonism Related Dis.* 62,  
1343 10–15. doi:10.1016/j.parkreldis.2019.01.007
- 1344 Yogev-Seligmann, G., Hausdorff, J. M., and Giladi, N. (2008). The role of executive function and  
1345 attention in gait. *Mov. Disord.* 23, 329–342. doi:10.1002/mds.21720
- 1346 Yogev-Seligmann, G., Rotem-Galili, Y., Mirelman, A., Dickstein, R., Giladi, N., and Hausdorff, J. M.  
1347 (2010). How does explicit prioritization alter walking during dual-task performance? effects of  
1348 age and sex on gait speed and variability. *Phys. Ther.* 90, 177–186. doi:10.2522/ptj.20090043
- 1349 Yotter, R. A., Dahnke, R., Thompson, P. M., and Gaser, C. (2011a). Topological correction  
1350 of brain surface meshes using spherical harmonics. *Hum. Brain Mapp.* 32, 1109–1124.  
1351 doi:10.1002/hbm.21095

- 1352 Yotter, R. A., Nenadic, I., Ziegler, G., Thompson, P. M., and Gaser, C. (2011b). Local cortical  
1353 surface complexity maps from spherical harmonic reconstructions. *NeuroImage* 56, 961–973.  
1354 doi:10.1016/j.neuroimage.2011.02.007
- 1355 Yun, H. J., Im, K., Yang, J.-J., Yoon, U., and Lee, J.-M. (2013). Automated sulcal depth  
1356 measurement on cortical surface reflecting geometrical properties of sulci. *PloS One* 8,  
1357 e55977. doi:10.1371/journal.pone.0055977
- 1358 Yushkevich, P. A., Piven, J., Hazlett, H. C., Smith, R. G., Ho, S., Gee, J. C., et al. (2006).  
1359 User-guided 3d active contour segmentation of anatomical structures: significantly improved  
1360 efficiency and reliability. *NeuroImage* 31, 1116–1128. doi:10.1016/j.neuroimage.2006.01.015
- 1361 Yushkevich, P. A., Pluta, J. B., Wang, H., Xie, L., Ding, S.-L., Gertje, E. C., et al. (2015).  
1362 Automated volumetry and regional thickness analysis of hippocampal subfields and medial  
1363 temporal cortical structures in mild cognitive impairment. *Hum. Brain Mapp.* 36, 258–287.  
1364 doi:10.1002/hbm.22627
- 1365 Zahodne, L. B. and Reuter-Lorenz, P. A. (2019). Compensation and brain aging: A review and  
1366 analysis of evidence. *The aging brain: Functional adaptation across adulthood.* , 185–216doi:10.  
1367 1037/0000143-008



**Table 1.** Participant characteristics and testing timeline

| Variables                                   | Young adult<br>median (IQR) | Older adult<br>median (IQR) | W or $\chi^2$ | FDR<br>corr. $p$ | Effect<br>size <sup>a</sup> |
|---------------------------------------------|-----------------------------|-----------------------------|---------------|------------------|-----------------------------|
| <b>Demographics</b>                         |                             |                             |               |                  |                             |
| Sample size                                 | 37                          | 23                          |               |                  |                             |
| Age (years)                                 | 21.78 (2.45)                | 72.82 (9.94)                |               |                  |                             |
| Sex                                         | 19 F; 18 M                  | 12 F; 11 M                  | 0.004         | 0.951            |                             |
| <b>Physical characteristics and fitness</b> |                             |                             |               |                  |                             |
| Handedness laterality score <sup>b</sup>    | 85.71 (25.00)               | 100.00 (22.43)              | 351.00        | 0.373            | -0.15                       |
| Footedness laterality score <sup>b</sup>    | 100.00 (22.22)              | 100.00 (133.93)             | 479.00        | 0.522            | -0.12                       |
| Body mass index (kg/m <sup>2</sup> )        | 22.71 (5.57)                | 25.86 (3.72)                | 200.50        | <b>0.009**</b>   | -0.44                       |
| Leisure-time physical activity <sup>c</sup> | 46.00 (38.00)               | 26.00 (22.00)               | 578.50        | <b>0.020*</b>    | -0.35                       |
| <b>Balance and fear of falling</b>          |                             |                             |               |                  |                             |
| Balance confidence <sup>d</sup>             | 97.81 (3.75)                | 94.38 (4.85)                | 624.50        | <b>0.014**</b>   | -0.39                       |
| Fear of falling <sup>d</sup>                | 17.00 (3.00)                | 19.00 (2.00)                | 233.00        | <b>0.014*</b>    | -0.38                       |
| <b>Education and cognition</b>              |                             |                             |               |                  |                             |
| Years of education                          | 15.00 (3.00)                | 16.00 (4.00)                | 243.00        | <b>0.018**</b>   | -0.36                       |
| MoCA score                                  | 28.00 (3.00)                | 27.00 (2.50)                | 563.50        | 0.079            | -0.27                       |
| <b>Alcohol use</b>                          |                             |                             |               |                  |                             |
| AUDIT score <sup>e</sup>                    | 2.00 (3.00)                 | 1.00 (4.00)                 | 509.50        | 0.347            | -0.17                       |
| <b>Hours of sleep</b>                       |                             |                             |               |                  |                             |
| Behavioral session                          | 7.00 (1.50)                 | 7.50 (1.38)                 | 365.00        | 0.647            | -0.09                       |
| MRI session                                 | 7.00 (2.00)                 | 7.00 (1.25)                 | 339.00        | 0.347            | -0.17                       |
| <b>Testing timeline<sup>f</sup></b>         |                             |                             |               |                  |                             |
| Behav. vs. MRI (days)                       | 4.0 (7.0)                   | 5.0 (4.5)                   | 392.00        | 0.716            | -0.07                       |
| Behav. vs. MRI start (hours)                | 1.33 (1.45)                 | 1.25 (1.01)                 | 432.50        | 0.951            | -0.01                       |

*Note:* In the second and third columns, we report the median  $\pm$  interquartile range (IQR) for each age group in all cases except for sex. For sex, we report the number of males and females in each age group. In the fourth and fifth columns, for all variables except sex, we report the result of a nonparametric two-sample, two-sided Wilcoxon rank-sum test. For sex, we report the result of a Pearson's chi-square test for differences in the sex distribution within each age group. All participants with  $T_1$ -weighted scans are included in the comparisons in this table. However, we excluded several individuals from the diffusion-weighted image analyses (see Section 2.1).  $P$  values were FDR-corrected (Benjamini and Hochberg, 1995) across all models included in this table. \* $p < 0.05$ , \*\* $p < 0.01$ . Significant  $p$  values are bolded.

<sup>a</sup>In the sixth column, we report the nonparametric effect size as described by (Rosenthal et al., 1994; Field et al., 2012).

<sup>b</sup>We calculated handedness and footedness laterality scores using two self-report surveys: the Edinburgh Handedness Inventory (Oldfield, 1971) and the Waterloo Footedness Questionnaire (Elias et al., 1998).

<sup>c</sup>We assessed self-reported physical activity using the Godin Leisure-Time Exercise Questionnaire (Godin et al., 1985).

<sup>d</sup>Participants self-reported Activities-Specific Balance Confidence scores (Powell and Myers, 1995) and fear of falling using the Falls Efficacy Scale (Tinetti et al., 1990).

<sup>e</sup>Participants self-reported alcohol use on the Alcohol Use Disorders Identification Test (AUDIT) (Piccinelli, 1998).

<sup>f</sup>Here we report the days between the testing sessions and the hours between the start time of the testing sessions.

**Table 2.** Age and condition differences in gait and subtraction performance

| Mean (SD)                               | Predictors         | Estimates (SE)          | CI             | t              | FDR Corr. $p$ | $R^2$     |
|-----------------------------------------|--------------------|-------------------------|----------------|----------------|---------------|-----------|
| <b>Gait speed (m/s)</b>                 |                    |                         |                |                |               |           |
| Young: 1.02 (0.17)                      | Old: 0.97 (0.20)   | Fixed effects           |                |                |               |           |
| Single: 1.06 (0.16)                     | Dual: 0.95 (0.19)  | (Intercept)             | 1.08 (0.03)    | 1.02-1.14      | 37.90         |           |
|                                         |                    | Age group (Old)         | -0.05 (0.05)   | -0.14-0.04     | -1.12         | 0.358     |
|                                         |                    | Condition (Dual)        | -0.12 (0.02)   | -0.15-(-0.09)  | -7.41         | <0.001*** |
|                                         |                    | Age group (Old)*        | 0.01 (0.03)    | -0.05-0.06     | 0.24          | 0.810     |
|                                         |                    | Condition (Dual)        |                |                |               |           |
|                                         |                    | Random effects          |                |                |               |           |
|                                         |                    | $\sigma^2$              | 0.00           |                |               |           |
|                                         |                    | $\tau_{00}$ Participant | 0.03           |                |               |           |
|                                         |                    |                         |                |                |               | 0.12      |
| <b>Step time variability (SD)</b>       |                    |                         |                |                |               |           |
| Young: 0.02 (0.01)                      | Old: 0.02 (0.01)   | Fixed effects           |                |                |               |           |
| Single: 0.02 (0.01)                     | Dual: 0.02 (0.01)  | (Intercept)             | 0.02 (0.002)   | 0.01-0.02      | 9.91          |           |
|                                         |                    | Age group (Old)         | 0.0004 (0.003) | 0.00-0.01      | 0.16          | 0.870     |
|                                         |                    | Condition (Dual)        | 0.01 (0.002)   | 0.00-0.01      | 3.23          | 0.004**   |
|                                         |                    | Age group (Old)*        | 0.003 (0.003)  | 0.00-0.01      | 1.15          | 0.787     |
|                                         |                    | Condition (Dual)        |                |                |               |           |
|                                         |                    | Random effects          |                |                |               |           |
|                                         |                    | $\sigma^2$              | 0.00           |                |               |           |
|                                         |                    | $\tau_{00}$ Participant | 0.03           |                |               |           |
|                                         |                    |                         |                |                |               | 0.11      |
| <b>Subtraction accuracy (% correct)</b> |                    |                         |                |                |               |           |
| Young: 93.53 (8.34)                     | Old: 85.87 (11.15) | Fixed effects           |                |                |               |           |
| Single: 89.72 (91.63)                   | Dual: 91.63 (9.11) | (Intercept)             | 92.93 (1.56)   | 89.80-96.06    | 59.50         |           |
|                                         |                    | Age group (Old)         | -8.62 (2.56)   | -13.75-(-3.50) | -3.37         | 0.005**   |
|                                         |                    | Condition (Dual)        | 1.20 (1.36)    | -1.53-3.93     | 0.88          | 0.381     |
|                                         |                    | Age group (Old)*        | 1.92 (2.23)    | -2.55-6.39     | 0.86          | 0.787     |
|                                         |                    | Condition (Dual)        |                |                |               |           |
|                                         |                    | Random effects          |                |                |               |           |
|                                         |                    | $\sigma^2$              | 34.34          |                |               |           |
|                                         |                    | $\tau_{00}$ Participant | 55.92          |                |               |           |
|                                         |                    |                         |                |                |               | 0.30      |

Table 2. Continued

| Mean (SD)                                    | Predictors                | Estimates (SE) | CI            | t     | FDR Corr. $p$ | $R^2$ |
|----------------------------------------------|---------------------------|----------------|---------------|-------|---------------|-------|
| Total # of subtractions attempted            |                           |                |               |       |               |       |
| Young: 33.97 (16.52)    Old: 28.14 (15.08)   | Fixed effects             |                |               |       |               |       |
| Single: 33.36 (17.82)    Dual: 30.24 (14.34) | <i>(Intercept)</i>        | 35.62 (2.64)   | 30.33-40.91   | 13.49 |               |       |
|                                              | Age group ( <i>Old</i> )  | -6.08 (4.32)   | -14.74-2.58   | -1.41 | 0.331         |       |
|                                              | Condition ( <i>Dual</i> ) | -3.30 (1.19)   | -5.69-(-0.91) | -2.76 | 0.010*        |       |
|                                              | Age group ( <i>Old</i> )* |                |               |       |               |       |
|                                              | Condition ( <i>Dual</i> ) | 0.48 (1.95)    | -3.43-4.39    | 0.25  | 0.810         |       |
|                                              | Random effects            |                |               |       |               |       |
|                                              | $\sigma^2$                | 26.33          |               |       |               |       |
|                                              | $\tau_{00}Participant$    | 231.65         |               |       |               |       |
|                                              |                           |                |               |       |               | 0.29  |

*Note:* On the left, we report the mean (standard deviation) for each outcome variable, split by age group and by condition (i.e., single or dual). On the right, we report the results of a linear mixed effects model testing for age group, condition, and interaction effects for each variable.  $P$  values were FDR-corrected based on each predictor of interest (e.g., age group; Benjamini and Hochberg, 1995). We report marginal  $R^2$  values, which consider only the variance of the fixed effects. SD = standard deviation; SE = standard error; CI = 95% confidence interval.

\* $p_{FDR-corr} < 0.05$ , \*\* $p_{FDR-corr} < 0.01$ , \*\*\* $p_{FDR-corr} < 0.001$ .

**Table 3.** Regions of age difference in the relationship of sulcal depth with the DTcost of gait speed and step time variability

| Region                          | Overlap of Atlas Region | TFCE Level       |                |
|---------------------------------|-------------------------|------------------|----------------|
|                                 |                         | Extent ( $k_E$ ) | $p_{FWE-corr}$ |
| DTcost of gait speed            |                         |                  |                |
| L precentral gyrus              | 31%                     | 3573             | 0.012*         |
| L postcentral gyrus             | 25%                     | —                | —              |
| L supramarginal gyrus           | 19%                     | —                | —              |
| L superior frontal gyrus        | 15%                     | —                | —              |
| L superior parietal lobule      | 100%                    | 196              | 0.048*         |
| DTcost of step time variability |                         |                  |                |
| L precentral gyrus              | 25%                     | 5720             | 0.008**        |
| L postcentral gyrus             | 20%                     | —                | —              |
| L supramarginal gyrus           | 17%                     | —                | —              |
| L insula                        | 8%                      | —                | —              |
| L pars opercularis              | 7%                      | —                | —              |
| L pars triangularis             | 6%                      | —                | —              |
| L superior parietal lobule      | 5%                      | —                | —              |
| L superior frontal gyrus        | 5%                      | —                | —              |

*Note:* Here we list all atlas regions from the Desikan-Killiany DK40 atlas (Desikan et al., 2006) that overlapped by 5% or more with each resulting cluster. The clusters were sorted by  $p_{FWE-corr}$  value (from smallest to largest), then by cluster size (from largest to smallest). We do not list volumetric (e.g., MNI space) coordinates in this table because volumetric coordinates cannot be mapped directly onto cortical surfaces. L = left. \* $p_{FWE-corr} < 0.05$ , \*\* $p_{FWE-corr} < 0.01$ .

**Table 4.** Regions of age difference in the relationship of FW-corrected white matter microstructure with the DTcost of gait speed

| Region                                                  | TFCE Level       |                | MNI Coordinates (mm) |     |    |
|---------------------------------------------------------|------------------|----------------|----------------------|-----|----|
|                                                         | Extent ( $k_E$ ) | $p_{FWE-corr}$ | X                    | Y   | Z  |
| <b>ADt</b>                                              |                  |                |                      |     |    |
| L corona radiata (superior) / superior long. fasciculus | 204              | 0.026*         | -24                  | -7  | 34 |
| L corona radiata (superior) / corticospinal tract       | –                | 0.027*         | -26                  | -15 | 31 |
| L corona radiata (superior) / superior long. fasciculus | –                | 0.045*         | -26                  | 1   | 27 |
| <b>RDt</b>                                              |                  |                |                      |     |    |
| L corona radiata (superior) / superior long. fasciculus | 126              | 0.034*         | -24                  | -7  | 34 |
| L corona radiata (superior) / corticospinal tract       | –                | 0.035*         | -26                  | -15 | 30 |

*Note:* Here we list up to three local maxima separated by more than 8 mm per cluster for all clusters with size  $k > 10$  voxels. The clusters were labeled using two atlases: the Johns Hopkins University (JHU) ICBM-DTI-82 White Matter Labels (listed first, to the left side of the slash), and the JHU White Matter Tractography atlas within FSL (listed second, to the right side of the slash) (Hua et al., 2008; Wakana et al., 2007). The clusters were sorted by  $p_{FWE-corr}$  value (from smallest to largest), then by cluster size (from largest to smallest). L = left; Long = longitudinal. \* $p_{FWE-corr} < 0.05$ .

**Table 5.** Regions of age difference in the relationship of structural ROIs with the DTcost of gait speed

|                            | Predictors             | Estimates (SE)   | t     | FDR<br>corr. <i>p</i> |
|----------------------------|------------------------|------------------|-------|-----------------------|
| Ventricular volume (% TIV) |                        |                  |       |                       |
| Lateral ventricle          | DTcost speed*age group | -0.03 (0.01)     | -3.23 | 0.030*                |
| GM volume (% TIV)          |                        |                  |       |                       |
| Precentral gyrus           | DTcost speed*age group | 0.001 (0.002)    | 0.46  | 0.782                 |
| Postcentral gyrus          | DTcost speed*age group | 0.002 (0.002)    | 0.96  | 0.782                 |
| Thalamus                   | DTcost speed*age group | 0.002 (0.001)    | 2.31  | 0.172                 |
| Striatum                   | DTcost speed*age group | -0.002 (0.001)   | -1.16 | 0.782                 |
| Globus pallidus            | DTcost speed*age group | -0.0001 (0.0002) | -0.57 | 0.782                 |
| FW (mean intensity)        |                        |                  |       |                       |
| Precentral gyrus           | DTcost speed*age group | 0.0003 (0.0004)  | 0.76  | 0.782                 |
| Postcentral gyrus          | DTcost speed*age group | 0.0002 (0.0003)  | 0.82  | 0.782                 |
| Thalamus                   | DTcost speed*age group | 0.0001 (0.0004)  | 0.23  | 0.820                 |
| Striatum                   | DTcost speed*age group | -0.0002 (0.0005) | -0.43 | 0.782                 |
| Globus pallidus            | DTcost speed*age group | 0.0002 (0.001)   | 0.28  | 0.820                 |
| Hippocampal volume (% TIV) |                        |                  |       |                       |
| Ant. hippocampus           | DTcost speed*age group | 0.001 (0.001)    | 0.98  | 0.782                 |
| Post. hippocampus          | DTcost speed*age group | 0.0004 (0.001)   | 0.60  | 0.782                 |
| Parahippo. cortex          | DTcost speed*age group | 0.001 (0.001)    | 2.06  | 0.208                 |

*Note:* Here we report the results of linear models testing for age differences in the DTcost of gait speed, controlling for sex. For conciseness, we report only the estimates (standard error, SE), t, and *p* values for the statistical test of interest: the interaction of age group with the DTcost of gait speed. *P* values for the interaction term were FDR-corrected (Benjamini and Hochberg, 1995). TIV = total intracranial volume; Ant = anterior; Post = posterior; Parahippo = parahippocampal. \* $p_{FDR-corr} < 0.05$ .

**Table 6.** Regions of age difference in the correlation of cortical thickness with the DTcost of step time variability

| Region                          | Overlap of Atlas Region | TFCE Level       |                |
|---------------------------------|-------------------------|------------------|----------------|
|                                 |                         | Extent ( $k_E$ ) | $p_{FWE-corr}$ |
| DTcost of step time variability |                         |                  |                |
| R superior temporal gyrus       | 68%                     | 790              | 0.032*         |
| R middle temporal gyrus         | 22%                     | –                | –              |
| R transverse temporal gyrus     | 8%                      | –                | –              |

*Note:* Here we list all atlas regions from the Desikan-Killiany DK40 atlas (Desikan et al., 2006) that overlapped by 5% or more with the resulting cluster. We do not list volumetric (e.g., MNI space) coordinates in this table because volumetric coordinates cannot be mapped directly onto cortical surfaces. R = right.

\* $p_{FWE-corr} < 0.05$ .

**Table 7.** Stepwise multiple regression results for the best models of DTcost of gait in older adults

| Predictors                                   | Estimates (SE)       | t     | p       | R <sup>2</sup> |
|----------------------------------------------|----------------------|-------|---------|----------------|
| DTcost of gait speed                         |                      |       |         |                |
| <i>Intercept</i>                             | 7.47 (22.01)         | 0.34  | 0.738   |                |
| L precentral gyrus sulcal depth              | 2.65 (0.86)          | 3.09  | 0.007** |                |
| L superior longitudinal fasciculus ADt       | -57084.67 (15931.84) | -3.58 | 0.002** |                |
| Sex                                          | -4.29 (1.24)         | -3.46 | 0.003** | 0.73           |
| DTcost of step time variability              |                      |       |         |                |
| <i>Intercept</i>                             | 406.64 (97.23)       | 4.18  | 0.001** |                |
| R superior temporal gyrus cortical thickness | -134.61 (36.17)      | -3.72 | 0.001** | 0.42           |

*Note:* Here we report the results of the stepwise multiple linear regressions testing for the best models of the DTcost of gait speed and step time variability, for the older adults only. In each full model, we included as predictors sex, as well as the top result coordinate for any significant voxelwise analyses, and values for any ROI models which returned a significant age group by DTcost of gait interaction. As diffusion-weighted results were included in these models,  $n = 21$  older adults, as this was the number of older adults who completed a diffusion-weighted scan. L = left; R = right. \*\* $p < 0.01$ .
